1 **Title: Evolution of ACE2 and SARS-CoV-2 Interplay Across 247 Vertebrates**

2 **Authors:** Tao Zhang<sup>1†</sup>, Qunfu Wu<sup>1†</sup>, Yicheng Ma<sup>1</sup>, Wenjing Liu<sup>2</sup>, Chengang Zhou<sup>1\*</sup>,  
3 Zhigang Zhang<sup>1,3\*</sup>

4 **Affiliations:**

5 <sup>1</sup>State Key Laboratory for Conservation and Utilization of Bio-Resources in Yunnan,  
6 School of Life Sciences, Yunnan University, No.2 North Cuihu Road, Kunming,  
7 Yunnan, 650091, China

8 <sup>2</sup>School of Medicine, Yunnan University, No.2 North Cuihu Road, Kunming, Yunnan,  
9 650091, China

10 <sup>3</sup>Lead Contact

11 <sup>†</sup>These authors contributed equally to this work

12 \*Correspondence: [zhangzhigang@ynu.edu.cn](mailto:zhangzhigang@ynu.edu.cn) (Z.Z.) or [chgzou@ynu.edu.cn](mailto:chgzou@ynu.edu.cn) (Z.C.)

13

14 **Abstract**

15 Severe acute respiratory syndrome coronavirus 2 (SARS-CoV-2) cause the most serious  
16 pandemics of Coronavirus Disease 2019 (COVID-19), which threatens human health  
17 and public safety. SARS-CoV-2 spike (S) protein uses angiotensin-converting enzyme  
18 2 (ACE2) as recognized receptor for its entry into host cell that contributes to the  
19 infection of SARS-CoV-2 to hosts. Using computational modeling approach, this study  
20 resolved the evolutionary pattern of bonding affinity of ACE2 in 247 jawed vertebrates  
21 to the spike (S) protein of SARS-CoV-2. First, high-or-low binding affinity phenotype  
22 divergence of ACE2 to the S protein of SARS-CoV-2 has appeared in two ancient  
23 species of jawed vertebrates, *Scyliorhinus torazame* (low-affinity, Chondrichthyes) and  
24 *Latimeria chalumnae* (high-affinity, Coelacanthimorpha). Second, multiple  
25 independent affinity divergence events recur in fishes, amphibians-reptiles, birds, and  
26 mammals. Third, high affinity phenotypes go up in mammals, possibly implying the  
27 rapid expansion of mammals might accelerate the evolution of coronaviruses. Fourth,  
28 we found natural mutations at eight amino acid sites of ACE2 can determine most of  
29 phenotype divergences of bonding affinity in 247 vertebrates and resolved their related  
30 structural basis. Moreover, we also identified high-affinity or low-affinity-associated  
31 concomitant mutation group. The group linked to extremely high affinity may provide

32 novel potentials for the development of human recombinant soluble ACE2 (hrsACE2)  
33 in treating patients with COVID-19 or for constructing genetically modified SARS-  
34 CoV-2 infection models promoting vaccines studies. These findings would offer  
35 potential benefits for the treatment and prevention of SARS-CoV-2.

36 **Keywords:** Vertebrates, ACE2, SARS-CoV-2, Bonding Affinity

37

## 38 **Introduction**

39 An ongoing global pandemic of coronavirus disease 2019 (COVID-19), caused by  
40 the severe acute respiratory syndrome coronavirus 2 (SARS-CoV-2), have resulted in  
41 more than 70 million confirmed cases in 190 countries and more  
42 than 1.5 million deaths. The SARS-CoV-2 is a positive-strand RNA virus that causes  
43 severe respiratory syndrome in human. The genome of SARS-CoV-2 shares about 96%  
44 identity to the Bat Coronavirus BatCoV RaTG13[1]. SARS-CoV-2-like CoV was found  
45 in the pangolin species (*Malayan pangolins*), showing 91.02% identical to SARS-CoV-  
46 2[2]. Accordingly, *Rhinolophus affinis* and Malayan pangolin (*Manis javanica*) are  
47 considered as potentially natural hosts of SARS-CoV2[1, 2]. Aside from bat and  
48 pangolin, experiments with infectious SARS-CoV-2 suggested that SARS-CoV-2  
49 replicates poorly in dogs, pigs, chickens, and ducks, but ferrets and cats are permissive  
50 to infection[3]. SARS-CoV-2 on mink farms was found to be transmitted between  
51 humans and mink and back to humans [4]. For non-human primates, *Macaca mulatta*  
52 is the most susceptible to SARS-CoV-2 infection, followed by *M. fascicularis* and  
53 *Callithrix jacchus*[5]. Syrian hamsters (*Mesocricetus auratus*) are also susceptible to  
54 SARS-CoV-2[6]. Anecdotal reports in a variety of news media reported that tigers in a  
55 New York Zoo tested positive for HCoV-19, in which these animals exhibited  
56 symptoms of the illness  
57 ([https://www.nationalgeographic.com/animals/2020/04/tiger-coronavirus-covid19-](https://www.nationalgeographic.com/animals/2020/04/tiger-coronavirus-covid19-positive-test-bronx-zoo/)  
58 [positive-test-bronx-zoo/](https://www.nationalgeographic.com/animals/2020/04/tiger-coronavirus-covid19-positive-test-bronx-zoo/)). Thus, to resolving why the SARS-CoV-2 has both broad host  
59 ranges and various infection phenotypes is very important for the control of SARS-  
60 CoV-2. Some clues are implicated by two recent computer modeling studies[7, 8] but  
61 still remains limited.

62 ACE2 is the cellular receptor for SARS-CoV-2[3, 9-11]. Binding to ACE2 receptor

63 is a critical initial step for the SARS-CoV-2 to enter into target cells[9]. Structural  
64 biologists have consecutively resolved structure of SARS-CoV-2 spike(S) protein and  
65 found SARS-CoV-2 S protein binds ACE2 with higher affinity than does SARS-CoV  
66 S protein[10], which may contribute to fast spread of COVID-19 from human to human,  
67 even human to animals (cat, tiger, and dog). Three following studies further provided  
68 deeply structural basis for the recognition of the SARS-CoV-2 by human ACE2  
69 (hACE2), and found about 22 amino acid sites are involved in the interaction with the  
70 receptor binding domain (RBD) of spike protein of SARS-CoV-2[3, 11, 12]. ACE2  
71 variants underlined interindividual variability and susceptibility to COVID-19 in Italian  
72 population[13]. Hence, it is very vital to elucidate whether natural and functional  
73 variations of the ACE2 determine both broad host ranges and diversified infection  
74 phenotypes of SARS-CoV-2 as well as to choose animal models, track down  
75 intermediate hosts, and develop recombinant or soluble ACE2 for the treatment of  
76 COVID-19. Even it would be helpful to understand why the bat species are natural  
77 reservoirs of SARS-CoV2 or SARS-CoV or SARSr CoV.

78

## 79 **Results**

### 80 **Multiple independent affinity divergences between SARS-CoV-2 and ACE2 in** 81 **different lineages of 247 Vertebrates**

82 We obtained 247 complete ACE2 protein sequences about the length of 800 amino  
83 acids from NCBI and Uniprot databases. Those ACE2 proteins represent 247 jawed  
84 vertebrates, belonging to Chondrichthyes, Coelacanthimorpha, Cladistia, Actinopteri,  
85 Amphibia, Crocodylia, Testudines, Lepidosauria, Aves and Mammalia (including  
86 *Homo species*) (**Supplementary Data Table S1**). All 247 ACE2 protein sequences  
87 were aligned and the regions that ranged from 19 to 619 amino acid sites referred to  
88 hACE2 were used to construct ACE2 protein tree and to perform homologous modeling  
89 of SARS-CoV2 RBD-ACE2 complex using Swiss-Modeling  
90 (<https://swissmodel.expasy.org/>). Binding affinity ( $1/K_d$ ) is typically measured and  
91 reported by the equilibrium dissociation constant ( $K_d$ ), which is used to evaluate  
92 molecular interactions[14]. The smaller the  $K_d$  value, the greater the binding affinity of  
93 the ligand for its target. The protein-protein binding affinity of ACE2 and SARS-CoV-

94 2 S RBD were estimated using online PRODIGY tool[15, 16] based on swill-modeling  
95 results. To estimate binding affinity phenotypes of jawed vertebrate ACE2 and SARS-  
96 CoV2 RBD (**Figure 1, Figure S1 and Supplementary Data TableS1**), all estimated  
97  $K_d$  values were normalized using the  $K_d$  value of hACE2 and S protein interplay for  
98 obtaining relative differential expression pattern of binding affinity as follows:  $K_{d\text{ others}}/$   
99  $K_{d\text{ homo}} > 1$ , defined as lower affinity than human;  $K_{d\text{ others}}/ K_{d\text{ homo}} = 1$ , the same affinity to  
100 human;  $K_{d\text{ homo}}/ K_{d\text{ others}} > 1$ , higher affinity than human.

101 We firstly revealed the divergence of high-or-low affinity between ACE2 and  
102 SARS-CoV2 occurs in two most ancient jawed vertebrates Chondrichthyes (about 16  
103 times lower than human,  $K_d(\text{hACE2}) = 2.1\text{nM}$ ) and Coelacanthimorpha (nearly 10  
104 times higher than human) (**Figure 1A and Figure S1A**). During the evolution of jawed  
105 vertebrates, we gradually unveiled multiple independent events of binding affinity  
106 divergence appearing in Actinopteri, Amphibia, Lepidosauria, Aves and Mammals.  
107 Compared with Mammals, high-affinity phenotypes are rare in Actinopteri (28%) and  
108 Aves (13%) (**Figure 1B, Figure S1B and Supplementary Data TableS1**). In  
109 mammalian species, the prevalence of high-affinity phenotypes is up to 51%, indicating  
110 the presence of mammal species might drive fast evolution of SARS-CoV-2 or SARS-  
111 CoV-2-like CoVs. We further found distinct binding affinity divergences in the different  
112 orders of mammals (**Figure 1C-1D and Figure S1C-1D**). High prevalence of high-  
113 affinity phenotypes appears in Artiodactyla (86%) and Carnivora (96%) (**Figure 1D**  
114 **and Figure S1D**). Different from Artiodactyla, Perissodactyla species (Horses) which  
115 is the most closely related to Artiodactyla show low-affinity phenotypes (7.3nM). Low-  
116 affinity phenotypes were dominant in Chiroptera (88%) and Rodentia (83%). Moreover,  
117 the  $K_d$  values ( $14.56 \pm 4.08$  nM) (mean  $\pm$  S.E.) of Chiroptera species are significantly  
118 higher than those ( $3.63 \pm 0.51$  nM) of Rodentia species. *Rhinolophus sinicus* showed  
119 high  $K_d$  value of 68nM. This finding suggests most of Chiroptera species have low  
120 affinity or high tolerance to SARS-CoV-2 and theoretically can be considered as the  
121 most suitable carriers of SARS-CoV-2 or SARS-CoV-2-like CoVs. In Primates (54%  
122 high and 29% low) and their closely outgroup Scandentia, we found slightly high or  
123 consistent affinity phenotypes in Old World Monkeys (OWMs) with one exception of  
124 Golden snub-nosed monkey with weakly low affinity. In contrast, low-affinity

125 phenotypes appeared in New World Monkeys (NWMs), *Tarsiiformes*, *Lorisiformes* as  
126 well as Chinese tree shrew (Scandentia order as the closely relative of Primates).

127 Surprisingly, Coquerel's sifaka (*Propithecus coquereli*) belonging to ancient  
128 primates (Lemuriformes species) shows high affinity (1.2nM). In other rare orders of  
129 mammals, we also found the presence of high-or-low affinity phenotypes, such as the  
130 most ancient mammal Platypus (*Ornithorhynchus anatinus*) showing high affinity  
131 (0.83nM) and Cape golden mole (*Chrysochloris asiatica*) showing greatly low affinity  
132 (52nM).

133 We systematically explored the ACE2 affinity to the S protein of SARS-CoV-2  
134 across 247 vertebrate hosts. 54 animal species from our studied cohort were  
135 experimentally confirmed by published or pre-printed reports so far, including 48  
136 susceptible and six uninfected animal species[3, 6, 17-25]. In this study, 39 of 48  
137 reported infected animals had highly predicted affinity and 5 of 6 experimentally  
138 showing no infection were predicted having low affinity. Accordingly, high consistence  
139 between our predicated and experimentally confirmed phenotypes suggests the  
140 reliability of predicted phenotypes in this study.

#### 141 **Detecting the effect of known amino acid sites in ACE2 involved in the interaction** 142 **with SARS-CoV-2 on affinity divergences in vertebrates**

143 To investigate what amino acid variations in ACE2 leading to affinity divergences  
144 between ACE2 and the S protein of SAR-CoV-2, we firstly characterized all mutations  
145 of 247 vertebrates in known 22 amino acid sites[12] determining the function of ACE2  
146 binding to S protein and then estimated affinity changes of all mutants by mutating  
147 corresponding amino acids in hACE2. According to affinity fold changes of mutated  
148 type (MT) and wild type (WT), we found 55.9%, 76.5%, and 91.9% of WT can be  
149 recovered in MT below 1.41, 2.00, and 4.00-fold changes, respectively (**Figure S2**).  
150 These results suggested that the variations of known 22 amino acid sites were unable  
151 to completely explain our predicted affinity phenotype variations.

152 To determine what natural variations in ACE2 protein determine our predicted  
153 affinity divergence, we selected top 3 species with high-or-low affinity in Actinopteri,  
154 Aves, and Mammals and detected amino acid changes corresponding to high-or-low  
155 affinity phenotypes, which were shared by at least two species with consistent

156 phenotype but absent in species with converse phenotype (**Figure 2A**). All detected  
157 amino acid variations were traced into two ancient species *Scyliorhinus torazame* (low-  
158 affinity, Chondrichthyes) and *Latimeria chalumnae* (high-affinity, Coelacanthimorpha)  
159 (Figure 2A). Total 64 amino acid sites were detected possibly involved in altering  
160 bonding affinity of ACE2 to S protein (**Figure 2A**), which showed host specificities of  
161 fishes, birds, and mammals. To confirm whether those amino acid changes in each  
162 species lead to similar phenotypes, we constructed amino acid mutants in hACE2 and  
163 tested bonding affinity of the mutants to S-protein. We found wild phenotypes can be  
164 almost recovered in hACE2 (**Figure S3**). Crossed amino acid replacements linked to  
165 high or low affinity phenotypes in hACE2 also confirmed phenotypic reversal (**Figure**  
166 **S3**). These results suggested our detected conserved amino acid changes had potentials  
167 to yield observed phenotype divergences. By testing affinities of different mutations,  
168 we found that natural variations of 16 amino acid sites might be linked to affinity  
169 divergences of top 3 species with high-or-low affinity in Actinopteri (e.g., Q27 and  
170 A27), Aves (e.g., N27 and I27), and Mammals (e.g., Q79 and H41) (**Figure 2B**). These  
171 findings suggested multiple independent amino acid mutation events might contribute  
172 to convergent affinity divergences in different jawed vertebrate lineages.

173 To further determine what amino acid changes result in high-or-low affinity  
174 phenotype divergences in fish, bird, and mammals, we performed hACE2-based  
175 affinity tests using step-by-step single amino acid mutation of conserved amino acid  
176 residues associated with binding affinity changes in four vertebrate animal pairs. Our  
177 results showed that Q27 and A27 led to most of high-and-low affinity divergences in  
178 fishes (**Figure 2B and Figure S4**). N27 and I27 caused crucial differences of high-and-  
179 low affinity phenotypes in birds (**Figure 2B and Figure S5**). Q79 and H41 produced  
180 major divergences of high-and-low affinity in mammals (**Figure 2B and Figure S6**).  
181 Other amino acid mutations relying on those key amino acid mutations can strengthen  
182 or weaken bonding affinities (**Figure 2B, 2C**). Combined with phenotype testing based  
183 on step-by-step single amino acid mutation (**Figures S4-S7**), we speculated that  
184 concomitant amino acid mutations of 19-82 amino acid region (referring hACE2) might  
185 be involved in affinity divergences in jawed vertebrates. Even so, we found 41Y to H  
186 mutation only covering 20 of 41 low-affinity mammal species and five species in non-



187 mammals (**Figure S8**), indicating that novel mutations still need to be further  
188 investigated.

### 189 **Novel amino acid mutations contributing to recurred affinity divergences in** 190 **vertebrates**

191 By performing the alignment of 19-82 amino acid region of 247 vertebrates, we  
192 found candidate amino acid changes of eight conserved amino acid sites including 19,  
193 24, 27, 30, 34, 41, 79, and 82 (referred to as hACE2) associated with phenotype  
194 divergences (**Figures 2 and 3, Figure S8**). To confirm this observation, we conducted  
195 a series of affinity tests by mutating all single amino acids at each of the 8 sites from  
196 247 vertebrates in hACE2 (**Figure 3A**). S19 and T27 potentially linked to low-affinity  
197 phenotype is dominant in mammals and D19 and E27 is in non-mammals. Q24 deletion  
198 leading to low affinity appear in non-mammals. Q30 and N30 resulting in high affinity  
199 appeared in both mammals and non-mammals. K30 and S30 could bring about high  
200 affinity in non-mammals. R34, K34, and Y34 (specific to Carnivora) may contribute to  
201 high affinity. 79M was mainly associated with low affinity in Artiodactyla order species  
202 of mammals. All other mutations at site 79 could be linked with high affinity. Mutations  
203 at site 82 also contribute to increased affinity. Totally, mutations with lower affinity at  
204 sites 24 and 34 could explain low-affinity phenotypes in about 50% mammal species  
205 lack of H41 (**Figure 3A**). By screening those mutations with the most extreme affinity  
206 at any one of eight sites, we preliminarily identified a high-affinity-associated  
207 concomitant mutation group (N(P)19-N27-Q30-Y41-Q79-T82) and low-affinity-  
208 associated concomitant mutation group (L19-24Del-A27-N34-H41-M79-M82)  
209 (**Figure 3B and 3C**). By performing consistent mutations in vertebrate species with  
210 converse phenotypes, we found candidate functional concomitant mutations obviously  
211 reversed bonding affinity phenotypes across vertebrates (boosted affinity in **Figure 3B**  
212 and reduced affinity in **Figure 3C**). These results further suggested that amino acid  
213 variations of eight conserved amino acid sites (referred to as hACE2: 19, 24, 27, 30, 34,  
214 41, 79, and 82) across 247 jawed vertebrates might contribute to bonding affinity  
215 divergences with the SARS-CoV-2 S protein.

### 216 **Structural basis determining affinity divergence of different lineages in** 217 **vertebrates**

218 We found there are the mutations of eight amino acid sites in ACE2 contributing to  
219 significant SARS-CoV-2-interacting changes (**Figure 4**). The presence of polar  
220 interaction bonds or the shrink of contacting face contributed by amino acid mutations  
221 can increase bonding affinity of ACE2 to the S protein. For example, compared with  
222 hACE2, N27/Q27 residues form novel polar bonds to Y473 in the S protein of SARS-  
223 CoV-2, which can increase bonding affinity implicated by lower  $K_d$  values (1.0nM and  
224 1.1 nM, respectively). Q30 (1.6nM), Q79 (1.0nM) and T82 (1.4nM) showed higher  
225 affinity mainly due to the shrink of interacting face to S protein. In contrast, the loss of  
226 polar bonds or the enlargement of contacting face to S protein determine lower bonding  
227 affinity of ACE2 to S protein. For example, H41 lost hydrogen bond to both N501 and  
228 T500 of S protein and then resulted in the lowest bonding affinity (9.2nM). The deletion  
229 of Q24 also caused low affinity (4.3nM). By enlarging the contacting face with the S  
230 protein, the residues A27 and I27 showed the second low bonding affinity (7.3nM and  
231 6.9 nM). L19, N34, and M79 weakly reduced bonding affinity by changing the  
232 interacting face between ACE2 and S protein. Those predicted structural interacting  
233 changes can potentially support extreme phenotype divergences of bonding affinity  
234 between ACE2 and the S protein of SARS-CoV-2.

235

## 236 **Discussion**

237 Multiple studies have confirmed that ACE2 is the cellular receptor for SARS-CoV-  
238 2 and have found about 22 key amino acid sites of human ACE2 (hACE2) to be  
239 responsible for the interaction with SARS-CoV-2[1, 3, 9, 12]. However, whether natural  
240 ACE2 variants from various vertebrates could contribute to probable SARS-CoV-2  
241 infections to non-human animals or transmissions from animals to humans is still  
242 unclear, although computational modeling, cell studies and animal experiments  
243 implicated that SARS-CoV-2 might infect non-human animals, such as some mammals  
244 including civet, ferrets, dog, cat, mink, pangolin, and so on. Our predicted affinity  
245 phenotype divergences recurring in different lineages (the oldest species, bony fishes,  
246 birds, and mammals) in 247 jawed vertebrates led to a possibility that the SARS-CoV-  
247 2 or SARS-CoV-2-like viruses are experiencing relaxed selection, which might partially  
248 contribute to intermittent appearances of diversified CoVs in recent years, such as



249 SARS-CoV (2002-2003 years)[26], MERS-CoV (2012-2015 years)[26], and SARS-  
250 CoV-2 (2019 years to date).

251 Few high-affinity non-mammalian hosts, such as those species in *Cichlidae* family  
252 of Actinopteri, *Pipridae* family of Aves, and Testudines might have possible risks for  
253 SARS-CoV-2 infection. Nevertheless, considering those animals as potential  
254 intermediate hosts of SAR-CoV-2 could be ignored due to their habitats apart from  
255 human or small population sizes or potential effects of other unknown functional  
256 molecules. According to this perspective, Turtles were thought to be potential  
257 intermediate hosts[27] is unconvincing. For animals with low affinity phenotypes, the  
258 predicted affinity (2.8nM) of chicken is lower than hACE2 affinity (2.1nM), consistent  
259 with the report that chicken was not susceptible to SARS-CoV-2 infection[3, 28]. Our  
260 predicted low affinity of snakes (*Ophiophagus Hannah*, 5.8nM; *Pseudonaja textilis*,  
261 6.9nM; *Python bivittatus*, 7.2nM) did not support that snakes were thought to be  
262 potential intermediate hosts[27]. On June 14 (2020), SARS-CoV-2 virus was detected  
263 in the cutting board of imported salmon (Chinook salmon) (*Oncorhynchus tshawytscha*)  
264 rising the discussion of whether salmon fish could be infected by SARS-CoV-2.  
265 Chinook salmon was not included in our studied cohorts but its close relative rainbow  
266 trout (*Oncorhynchus mykiss*) was predicted 3.6 times lower affinity (7.6nm) than  
267 hACE2 (2.1nm), indicating that Chinook salmon is not susceptible to SARS-CoV-2  
268 infection. These findings suggested frequent detections of SARS-CoV-2 virus in  
269 Chinook salmon and even other non-mammal vertebrates might be resulted from  
270 unknown contaminations.

271 Consistent with the findings from non-mammal species, we found consistent  
272 affinity phenotype divergences but an expansion of high-affinity phenotypes in 127  
273 mammals, offering possible implication that the rapid expansion of mammals might  
274 accelerate the evolution of SARS-CoV-2-like CoVs. As expected, high-affinity  
275 phenotypes were significantly enriched in Artiodactyla and Carnivora. Among 48  
276 mammals' species that were susceptible to infection of SARS-CoV-2 reported by *in*  
277 *vitro* as well as animal infection studies[1, 3, 6, 17-25], 28 animal species were from  
278 Artiodactyla and Carnivora orders. In Carnivora, whether SARS-CoV-2 can infect dogs  
279 or not triggered some controversies. Shi et al. study found dogs showed low

280 susceptibility to virus and poorly infected[3] but another study considered dogs as  
281 intermediate hosts for SARS-CoV-2 virus transmission[24]. Our predicted affinity of  
282 dog (*Canis lupus*) (1.6nM) tended to support SARS-CoV-2 infection to dog. Two dogs  
283 from households with confirmed human cases of COVID-19 in Hong Kong were found  
284 to be infected with SARS-CoV-2, further suggesting that these are instances of human-  
285 to-animal transmission of SARS-CoV-2[29]. It is unclear whether infected dogs can  
286 transmit the virus to other animals or back to humans. Bosco-Lauth *et al* study  
287 suggested that while neither dog nor cat developed clinical disease with the infection  
288 of SARS-CoV-2, cats shed infectious virus for up to 5 d and infected naive cats via  
289 direct contact, while dogs do not appear to shed virus. Cats that were reinfected with  
290 SARS-CoV-2 mounted an effective immune response and did not become  
291 reinfected[30]. Pig (*Sus scrofa*) from Artiodactyla order was another controversial  
292 animal. Some studies reported pigs were not susceptible to SARS-CoV-2[3, 28], yet  
293 other studies reported pig ACE2 could efficiently facilitated virus entry[1, 24]. We  
294 found that pig showed a slightly lower affinity (2.3nM) than hACE2 and thought that  
295 the infection risk of pig could not be ignored. By contrast, low affinity phenotypes were  
296 dominant in Rodentia and Chiroptera. Our predicted phenotypes of rodent animals were  
297 consistent with failure cases of SARS-CoV-2 infection in common rat and mouse  
298 model[1, 23, 24, 31]. Extreme low affinities were found in most of species in Chiroptera  
299 order in which *Rhinolophus sinicus* with the extremely low affinity (68nM) was  
300 considered as the natural host of SARS-CoV-2[1]. Extremely low affinity of Chiroptera  
301 order species might explain why bats are considered as natural reservoirs of SARS-  
302 CoV-like viruses[32, 33]. SARS-Cov-2 infection barely succeeded or succeeded just at  
303 very low level in *Rhinolophus sinicus* cells[1, 34, 35]. Nevertheless, SARS-CoV-2 can  
304 successfully infect *Rhinolophus sinicus* bat intestinal epithelium organoid[31]. Such  
305 differences of infection phenotypes might be partially due to technological bias of the  
306 intestinal epithelium organoid simulating real environment of *Rhinolophus sinicus* bat  
307 intestines.

308 Primate animals is the most convincing animal model for evaluating potential  
309 drugs and vaccines during the COVID-19 outbreak. In primate orders, we observed  
310 slightly high or consistent affinity phenotypes with hACE2 existed in OWMs, with one

311 exception of Golden snub-nosed monkey (2.6nM) with slightly lower affinity. The low-  
312 affinity phenotypes occur in NWMs, Tarsiiformes, Lorisiformes as well as Chinese tree  
313 shrew (2.6nM) (Scandentia order as the closely relative of Primates). Consistent with  
314 our predicted affinity phenotypes, *Macaca mulatta* (1.8nm) and *Macaca fascicularis*  
315 (1.9nM) of OWMs were successfully infected by SARS-CoV-2 while *Callithrix*  
316 *jacchus* (6.8nM) of NWMs failed in SARS-CoV-2 infection[5]. Ocular conjunctival  
317 inoculation of SARS-CoV-2 can cause mild COVID-19 in rhesus macaques (*Macaca*  
318 *mulatta*) and could not be re-infected after symptoms were alleviated with the specific  
319 antibody tested positively[5, 36]. *Cynomolgus* macaques (*Macaca fascicularis*) could  
320 shed virus for a prolonged period of time with COVID-19-like symptom[25]. These  
321 findings suggested that rhesus and cyophagous macaques are appropriate as animal  
322 models for evaluating vaccines and drugs for the treatment or prevention of COVID-  
323 19.

324 To determine what amino acid variations of ACE2 contribute to diversified affinity  
325 phenotypes is vital for the development of both drug and vaccine during the progress  
326 of COVID-19. We found 22 known amino acid residues in ACE2 were unable to explain  
327 affinity phenotype diversities from 247 vertebrates. In contrast, at the 8 amino acid sites  
328 around 19-82 amino acid region (referred to as hACE2), we found several novel natural  
329 mutations contributing to various binding affinity phenotypes. For example, N27/Q27,  
330 Q30, Q79 and T82 could increase the hACE2 binding affinity; yet, L19, N34, M79,  
331 H41, and deletion of Q24 enable clearly lower the affinity (**Figure 4**). H41 always  
332 existed in the extreme low affinity hosts, it could clearly lower the affinity of hosts that  
333 was with a higher than hACE2 affinity (**Figure 3c**) if the amino acid change of Y41 to  
334 H41 occurs. Structure analyses showed the losing of hydrogen bond to both N501 and  
335 T500 of S protein which was formed by Y41, resulting the lower affinity (**Figure 4**).  
336 Combining the amino acid residues with the extreme affinity phenotype at each of the  
337 8 sites, we further identified a high-affinity-associated concomitant mutation group  
338 (19N(P)-27N-30Q-41Y-79Q-82T) and low-affinity-associated concomitant mutation  
339 group (19L-24Del-27A-34N-41H-79M-82M) which could clearly reverse affinity  
340 phenotypes between high-or-low-affinity animal species. The hrsACE2 can  
341 significantly block early stages of SARS-CoV-2 infections[37]. The combined amino

342 acid residues contributing to extreme higher affinity may provide novel potentials for  
343 the development of potential human recombinant soluble ACE2 (hrsACE2) in treating  
344 patients with COVID-19 or for constructing genetically modified SARS-CoV-2  
345 infection models promoting vaccines studies.

346 SARS-CoV-2 uses ACE2 as recognized receptor for its entry into host cell and  
347 the virus surface S protein mediates SARS-CoV-2 entry into cells[9, 38, 39], which  
348 comprises two functional subunits responsible for binding to the host cell receptor (S1  
349 subunit) and fusion of the viral and cellular membranes (S2 subunit). During SARS-  
350 CoV-2 infection, once the RBD of S1 subunit binds to hosts ACE2, S protein is cleaved  
351 by host proteases into S1 and S2 subunits at the S2' site before extensive irreversible  
352 conformational changes for the membrane fusion[39, 40]. This cleavage can activate  
353 the membrane fusion[39, 40]. Some studies have confirmed that the cathepsin B and L  
354 (CatB/L) and TMPRSS2 play important roles in S protein cleavage of SARS-CoV-2[9,  
355 41-43]. B0AT1 (SLC6A19) often serves as a transporter for ACE2 and the presence of  
356 B0AT1 may block TMPRSS2 to the cutting site on ACE2[11]. However, whether  
357 B0AT1 can suppress SARS-CoV-2 infection by blocking ACE2 cleavage still remain  
358 to be explored. Distinct from SARS-CoV, SARS-CoV-2 virus shares a similar furin  
359 cleavage sites at S1/S2 sites with MERS-CoV virus[2]. Like MERS-CoV, pre-cleavage  
360 at the S1/S2 site mediated by furin protein might promote subsequent TMPRSS2-  
361 dependent entry of SARS-CoV-2[39, 44, 45]. Besides ACE2, CD147-SP also could be  
362 recruited by SARS-CoV-2 for invading host cells[46]. Using human furin (GeneBank  
363 accession: NP\_001276752.1), cathepsin L (GeneBank accession: NP\_001903),  
364 TMPRSS2 (GeneBank accession: NP\_005647.3), and CD147-SP (GeneBank accession:  
365 BAC76828.1) proteins blasting against Non-redundant protein sequences (NR) in  
366 NCBI, we found 308 placental mammals share amino acid sequence identity of furin  
367 higher than 90% with human. Only 26 species from *Simiiformes* infraorder share higher  
368 than 90% identity of cathepsin L with human and 39 species from *Hominoidea*  
369 superfamily share higher than 90% identity with human TMPRSS2. The human  
370 CD147-SP protein only shared higher than 90% identity with those of three Apes  
371 species, including Sumatran orangutan, chimpanzee, and western lowland gorilla.  
372 These results suggested that furin protein is highly conserved but TMPRSS2 and

373 CD147-SP are greatly diverged or lineage specific across vertebrates. Recently, a new  
374 host factor Neuropilin-1 was reported associated with SARS-Cov-2 infection [47]. By  
375 blasting against NR database, human Neuropilin-1 (GeneBank accession: AAP80144.1)  
376 were found shared more than 93% identity with placental mammals. Like furin protein,  
377 Neuropilin-1 is also highly conserved. It further indicated that TMPRSS2 and CD147-  
378 SP with highly species specificity might contribute to various infection phenotypes to  
379 SARS-CoV-2 to different animal hosts. Despite binding to ACE2 is well-known to a  
380 critical step for cell entry of SARS-CoV-2 or SARS-CoV-2 like virus, our study  
381 suggested that only the affinity testing of ACE2 could not completely estimate SARS-  
382 Cov-2 infection. In the future, it is crucial to elucidate pathogenetic mechanism of  
383 SARS-CoV-2 by considering comprehensive understanding of combined multiple host  
384 factors, such as cleavage proteases or novel functional molecules.

385 This study provides four major findings for better understanding the evolutionary  
386 pattern of bonding affinity of ACE2 in 247 jawed vertebrates to the S protein of SARS-  
387 CoV-2. First, high-or-low binding affinity phenotype divergence of ACE2 to the S  
388 protein of SARS-CoV-2 has appeared in two ancient species of jawed vertebrates,  
389 *Scyliorhinus torazame* (low affinity, Chondrichthyes) and *Latimeria chalumnae* (high  
390 affinity, Coelacanthimorpha). Second, multiple independent affinity divergence events  
391 recur in fishes, amphibians-reptiles, birds, and mammals, which could be explained to  
392 great extent by lineage-specific amino acid mutations. Third, high affinity phenotypes  
393 go up in mammals, possibly implying the rapid expansion of mammals might accelerate  
394 the evolution of coronaviruses. Fourth, we found natural mutations at eight amino acid  
395 sites of ACE2 can determine most of phenotype divergences of bonding affinity in 247  
396 vertebrates and resolved structural basis of divergent bonding affinity phenotypes.  
397 Moreover, our identified high-affinity or low-affinity-associated concomitant mutation  
398 group would offer potential benefits for the treatment and prevention of SARS-CoV-2.  
399 In the future, much more attention was needed focusing on the cleavage proteins to  
400 obtain a detail and comprehensive description for preventing SARS-CoV-2 infection.

401

## 402 **Materials and Methods**

### 403 **Obtaining amino acid sequences of ACE2 and the S protein of SARS-CoV-2**

404 Raw ACE2 amino acid (AA) sequences belonging to vertebrates were downloaded  
405 from the nr database from NCBI and UniProt database. After manually removing AA  
406 sequences with length < 700aa or duplicated in the same host or that labeled by low  
407 quality in sequence title, a total of 247 ACE2 AA sequences representing 247  
408 vertebrates were finally kept. SARS-Cov-2 AA sequence were downloaded from  
409 GenBank with accession number MN908947.

#### 410 **Protein structure homology modeling and affinity prediction between wild ACE2** 411 **peptidase domain (PD) and the RBD of the S protein of SARS-CoV-2**

412 To test the bonding affinity between SARS-CoV-2 and vertebrate ACE2, we  
413 focused on the bonding affinity between ACE2 PD and the RBD of S protein of SARS-  
414 CoV-2. We first aligned ACE2 AA sequences of 247 vertebrates including hACE2 using  
415 MEGA X[48] with manually corrections using BioEdit v7.2.5 and then the PD regions  
416 ranging from 19 to 615 amino acid residues were extracted from all 247 vertebrates  
417 referring to hACE2[11]. The ACE2 protein tree of 247 vertebrates was built using  
418 MEGA X[48] and annotated with Interactive Tree Of Life (iTOL) v 5.51[49]. The RBD  
419 region of SARS-CoV-2 ranging from 318 to 510 amino acid residues was extracted  
420 according to the RBD domain of SARS-CoV BJ01[50].

421 Protein structure homology modeling were performed using SWISS-modeling  
422 workspace[51] using all 247 vertebrates' ACE2 PD AA sequences and RBD AA  
423 sequences of SARS-CoV-2 in automated mode.

424 Affinity prediction were performed on PRODIGY (PROtein binDIng enerGY  
425 prediction, <https://bianca.science.uu.nl/prodigy>) [16] with pdb file generated by  
426 SWISS-modeling. Temperature was set to 37°C.

#### 427 **Protein structure homology modeling and affinity prediction between vertebrate-** 428 **derived-hACE2 mutants and the RBD of S protein of SARS-Cov-2**

429 Based on known protein contact residues between SARS-CoV-2 RBD and  
430 hACE2[12], we obtained 22 protein contact residues including S19, Q24, T27, F28,  
431 D30, K31, H34, E35, E37, D38, Y41, Q42, L45, L79, M82, Y83, N330, K353, G354,  
432 D355, R357 and R393 in hACE2. Corresponding to hACE2, we extracted from contact  
433 22 amino acid residues from 247 vertebrates' ACE2 based on the Mega X aligned file  
434 using BioEdit v7.2.5.



435 We next mutated all 22 residues described above from hACE2 to 247 vertebrates  
436 to build vertebrate-derived-hACE2 mutants. The 247 vertebrate-derived-hACE2 PD  
437 AA sequence and SARS-CoV-2 RBD AA sequence were used to conduct protein  
438 structure homology modeling and affinity prediction according to the methods  
439 described above.

#### 440 **Screening potential amino acid sites contributing to the affinity diversity between** 441 **247 vertebrates' ACE2 PD and SARS-CoV-2 RBD**

442 To find amino acid residues that initially determined the diverse affinity between  
443 247 vertebrates' ACE2 PD and SARS-CoV-2 RBD, we selected three vertebrates with  
444 top high affinity (from at least two orders) and another three vertebrates with top low  
445 affinity (from at least two orders) in Actinopteri (High: *Takifugu flavidus*,  
446 *Mastacembelus armatus*, *Pundamilia nyererei*; Low: *Anarrhichthys ocellatus*,  
447 *Xiphophorus maculatus*, *Poecilia mexicana*), Aves (High: *Manacus vitellinus*, *Pipra*  
448 *filicauda*, *Neopelma chrysocephalum*; Low: *Zonotrichia albicollis*, *Numida Meleagris*,  
449 *Nothoprocta perdicaria*) and Mammals (High: *Physeter catodon*, *Procyon lotor*,  
450 *Zalophus californianus*; Low: *Rhinolophus pearsonii*, *Rhinolophus sinicus*,  
451 *Chrysochloris asiatica*) respectively. For six species from Actinopteri class, if the same  
452 amino acid residue appears at given amino acid site in two host species with converse  
453 affinity phenotypes, such amino acid sites were excluded from consensus amino acid  
454 residues determining high-or-low affinity phenotypes. The remaining consensus amino  
455 acid changes of ACE2 in at least two of host species with consistent affinity phenotypes  
456 were considered as potentially functional amino acid variations contributing to the  
457 affinity diversity. The same standards were performed for six animal species from Aves  
458 and those from Mammals. We obtained 12, 31, and 32 putative affinity-associated  
459 amino acid sites for Actinopteri class, Aves class, and Mammals class, respectively  
460 **(Figure 2A)**.

461 To confirm the potentials of putative affinity-associated amino acid variations in  
462 each vertebrate class causing affinity changes, we reconstructed amino acid variants by  
463 replacing corresponding amino acid residues in both hACE2 and those species with  
464 converse affinity phenotypes. The bonding affinities were estimated based on protein  
465 structure homology modeling of mutated ACE2 PD AA sequence and SARS-CoV-2

466 RBD AA sequence as described above (**Figure S2**).

467 By integrating putative affinity-associated amino acid sites from three vertebrate  
468 classes, we obtained a total of 64 sites each of which could differentiate between high-  
469 or-low affinity species in at least one vertebrate class. To trace whether amino acid  
470 changes at the 64 sites could reverse bonding affinity of two oldest vertebrate species  
471 in our studied cohort, *Latimeria chalumnae* (high-affinity) and *Scyliorhinus torazame*  
472 (low-affinity), we cross-replaced amino acid residues at corresponding 64 sites of  
473 ACE2 in *Latimeria chalumnae* and *Scyliorhinus torazame*. The built mutants were used  
474 to perform homology modeling and affinity prediction according to the method  
475 described above (**Figure S2**).

#### 476 **Identifying key amino acid changes or potential co-variants determining bonding** 477 **affinity of ACE2 and the RBD of S protein of SAR-CoV-2**

478 To identify key amino acid changes contributing to bonding affinity changes from  
479 three vertebrate classes above, we employed a step-by-step splicing strategy to  
480 construct a series of mutants. For example, based on our obtained 12 putative affinity-  
481 associated sites in each of six species of Actinopteri class, we successively sliced from  
482 1st to 2nd, 1st to 3rd, 1st to 4th, ..., 1st to 12<sup>th</sup> sites in Actinopteri species and final  
483 obtained 72 aa-slicing groups. Next, we replaced corresponding amino acid residues in  
484 hACE2 with those in each slicing group from Actinopteri species and performed protein  
485 structure homology modeling and affinity prediction of mutated hACE2 and SARS-  
486 CoV-2 RBD as described above. Similar slicing was also performed for those putative  
487 affinity-associated sites in Aves class and Mammals class as well as two oldest  
488 vertebrate species (**Figures S4-S7**).

489 According to predicted affinity phenotypes following the change of slicing amino  
490 residues in species from each vertebrate class (Actinopteri, Aves, and Mammals), we  
491 selected amino acid residues at those sites leading to significant affinity changes as key  
492 amino acid residues determining bonding affinity and verified by homology modeling  
493 and affinity prediction based on hACE2 mutant building. In turn, we grouped multiple  
494 amino acid residues causing strong affinity shift to obtain amino acid co-variants  
495 contributing to extremely high or low affinity and verified by homology modeling and  
496 affinity prediction based on hACE2 mutants. To further confirm the reliability of amino

497 acid co-variants that boost or lower bonding affinity, we would mutate all amino acid  
498 residues from co-variants at corresponding amino acid sites in the ACE2 of all  
499 vertebrate species with converse affinity phenotypes (**Figure 3B and 3C**). If predicted  
500 affinity phenotypes of at least 95% host species were reversed significantly (at least  
501 two-fold changes), thus such amino acid co-variants were selected as candidate targets  
502 determining affinity phenotypes.

### 503 **The Structures alteration for MT hACE2 mutated by functional AA changes** 504 **relative to WT hACE2**

505 The 3D Complex Structure presentation was performed using PyMOL v2.0[52]  
506 with pdb file generated from protein structure homology modeling with SWISS-  
507 modeling workspace in automated mode (Figure 4).

### 508 **Quantification and Statistical Analysis**

509 Enrichment analysis of hosts with high or low affinity in each class or each  
510 mammalian order were performed with Fisher's exact test, and statistic p-values were  
511 corrected with Benjamini-Hochberg (BH) method. Enrichments with  $P_{BH} < 0.05$  were  
512 considered to be significant.

513

### 514 **Declarations**

### 515 **Availability of data and materials**

516 The dataset used in this study is provided as supplementary material (Tables S1).

517 This study did not generate code.

### 518 **Ethics approval and consent to participate**

519 Not applicable.

### 520 **Acknowledgements**

521 This study was supported by the National Key Research and Development  
522 Program of China (no. 2018YFC2000500), the Major Science and Technology Project  
523 in Yunnan Province of China (no. 202001BB050001), the  
524 Second Tibetan Plateau Scientific Expedition and Research (STEP) program (no.  
525 2019QZKK0503), and the Chinese National Natural Science Foundation (no.  
526 31970571 and U2002206).

### 527 **Author Contributions**

528 Z.Z. performed project planning, coordination, execution, and facilitation. T.Z.,  
529 W.Q., and M.Y. performed modeling analysis. W.Q. and L.W. processed data collection  
530 and phylogenetic analysis. Z.Z., Z.C., T.Z., and W.Q. prepared the manuscript.

### 531 **Declaration of Interests**

532 The authors declare no competing interests.

533

### 534 **References**

- 535 [1] Zhou P, Yang X-L, Wang X-G, Hu B, Zhang L, Zhang W, et al. A pneumonia  
536 outbreak associated with a new coronavirus of probable bat origin. *Nature*  
537 2020;579:270-3.
- 538 [2] Zhang T, Wu Q, Zhang Z. Probable Pangolin Origin of SARS-CoV-2 Associated  
539 with the COVID-19 Outbreak. *Current Biology* 2020;30:1346-51.e2.
- 540 [3] Lan J, Ge J, Yu J, Shan S, Zhou H, Fan S, et al. Structure of the SARS-CoV-2 spike  
541 receptor-binding domain bound to the ACE2 receptor. *Nature* 2020.
- 542 [4] Oude Munnink BB, Sikkema RS, Nieuwenhuijse DF, Molenaar RJ, Munger E,  
543 Molenkamp R, et al. Transmission of SARS-CoV-2 on mink farms between humans  
544 and mink and back to humans. *Science* 2020:eabe5901.
- 545 [5] Lu S, Zhao Y, Yu W, Yang Y, Gao J, Wang J, et al. Comparison of nonhuman  
546 primates identified the suitable model for COVID-19. *Signal Transduction and Targeted*  
547 *Therapy* 2020;5:157.
- 548 [6] Chan JF-W, Zhang AJ, Yuan S, Poon VK-M, Chan CC-S, Lee AC-Y, et al.  
549 Simulation of the Clinical and Pathological Manifestations of Coronavirus Disease  
550 2019 (COVID-19) in a Golden Syrian Hamster Model: Implications for Disease  
551 Pathogenesis and Transmissibility. *Clinical Infectious Diseases* 2020.
- 552 [7] Damas J, Hughes GM, Keough KC, Painter CA, Persky NS, Corbo M, et al. Broad  
553 host range of SARS-CoV-2 predicted by comparative and structural analysis of ACE2  
554 in vertebrates. *Proceedings of the National Academy of Sciences* 2020;117:22311-22.
- 555 [8] Procko E. The sequence of human ACE2 is suboptimal for binding the S spike  
556 protein of SARS coronavirus 2. *bioRxiv* 2020:2020.03.16.994236.
- 557 [9] Hoffmann M, Kleine-Weber H, Schroeder S, Krüger N, Herrler T, Erichsen S, et al.  
558 SARS-CoV-2 Cell Entry Depends on ACE2 and TMPRSS2 and Is Blocked by a  
559 Clinically Proven Protease Inhibitor. *Cell* 2020;181:271-80.e8.
- 560 [10] Wrapp D, Wang N, Corbett KS, Goldsmith JA, Hsieh C-L, Abiona O, et al. Cryo-  
561 EM structure of the 2019-nCoV spike in the prefusion conformation. *Science*  
562 2020;367:1260-3.
- 563 [11] Boehme M, van de Wouw M, Bastiaanssen TFS, Olavarria-Ramirez L, Lyons K,  
564 Fouhy F, et al. Mid-life microbiota crises: middle age is associated with pervasive  
565 neuroimmune alterations that are reversed by targeting the gut microbiome. *Mol*  
566 *Psychiatry* 2020;25:2567-83.
- 567 [12] Shang J, Ye G, Shi K, Wan Y, Luo C, Aihara H, et al. Structural basis of receptor  
568 recognition by SARS-CoV-2. *Nature* 2020;581:221-4.

- 569 [13] Benetti E, Tita R, Spiga O, Ciolfi A, Birolo G, Bruselles A, et al. ACE2 gene  
570 variants may underlie interindividual variability and susceptibility to COVID-19 in the  
571 Italian population. *European Journal of Human Genetics* 2020;28:1602-14.
- 572 [14] Seo M-H, Park J, Kim E, Hohng S, Kim H-S. Protein conformational dynamics  
573 dictate the binding affinity for a ligand. *Nature Communications* 2014;5:3724.
- 574 [15] Vangone A, Bonvin AMJJ. Contacts-based prediction of binding affinity in  
575 protein–protein complexes. *eLife* 2015;4:e07454.
- 576 [16] Xue LC, Rodrigues JP, Kastritis PL, Bonvin AM, Vangone A. PRODIGY: a web  
577 server for predicting the binding affinity of protein–protein complexes. *Bioinformatics*  
578 2016;32:3676-8.
- 579 [17] Gao Q, Bao L, Mao H, Wang L, Xu K, Yang M, et al. Development of an  
580 inactivated vaccine candidate for SARS-CoV-2. *Science* 2020:eabc1932.
- 581 [18] Lam TT, Jia N, Zhang YW, Shum MH, Jiang JF, Zhu HC, et al. Identifying SARS-  
582 CoV-2-related coronaviruses in Malayan pangolins. *Nature* 2020;583:282-5.
- 583 [19] Shan C, Yao YF, Yang XL, Zhou YW, Gao G, Peng Y, et al. Infection with novel  
584 coronavirus (SARS-CoV-2) causes pneumonia in Rhesus macaques. *Cell Res* 2020.
- 585 [20] Bao L, Deng W, Gao H, Xiao C, Liu J, Xue J, et al. Reinfection could not occur in  
586 SARS-CoV-2 infected rhesus macaques. *bioRxiv* 2020:2020.03.13.990226.
- 587 [21] Munster VJ, Feldmann F, Williamson BN, van Doremalen N, Pérez-Pérez L,  
588 Schulz J, et al. Respiratory disease and virus shedding in rhesus macaques inoculated  
589 with SARS-CoV-2. *bioRxiv* 2020:2020.03.21.001628.
- 590 [22] Kim YI, Kim SG, Kim SM, Kim EH, Park SJ, Yu KM, et al. Infection and Rapid  
591 Transmission of SARS-CoV-2 in Ferrets. *Cell Host Microbe* 2020;27:704-9 e2.
- 592 [23] Zhao X, Chen D, Szabla R, Zheng M, Li G, Du P, et al. Broad and Differential  
593 Animal Angiotensin-Converting Enzyme 2 Receptor Usage by SARS-CoV-2. *Journal*  
594 *of Virology* 2020;94:e00940-20.
- 595 [24] Liu Y, Hu G, Wang Y, Zhao X, Ji F, Ren W, et al. Functional and Genetic Analysis  
596 of Viral Receptor ACE2 Orthologs Reveals Broad Potential Host Range of SARS-CoV-  
597 2. *bioRxiv* 2020:2020.04.22.046565.
- 598 [25] Rockx B, Kuiken T, Herfst S, Bestebroer T, Lamers MM, Oude Munnink BB, et  
599 al. Comparative pathogenesis of COVID-19, MERS, and SARS in a nonhuman primate  
600 model. *Science (New York, N.Y.)* 2020;368:1012-5.
- 601 [26] Lu G, Wang Q, Gao GF. Bat-to-human: spike features determining ‘host jump’ of  
602 coronaviruses SARS-CoV, MERS-CoV, and beyond. *Trends in Microbiology*  
603 2015;23:468-78.
- 604 [27] Liu Z, Xiao X, Wei X, Li J, Yang J, Tan H, et al. Composition and divergence of  
605 coronavirus spike proteins and host ACE2 receptors predict potential intermediate hosts  
606 of SARS-CoV-2. *Journal of Medical Virology* 2020;92:595-601.
- 607 [28] Schlottau K, Rissmann M, Graaf A, Schön J, Sehl J, Wylezich C, et al. SARS-  
608 CoV-2 in fruit bats, ferrets, pigs, and chickens: an experimental transmission study. *The*  
609 *Lancet Microbe* 2020;1:e218-e25.
- 610 [29] Sit THC, Brackman CJ, Ip SM, Tam KWS, Law PYT, To EMW, et al. Infection of  
611 dogs with SARS-CoV-2. *Nature* 2020;586:776-8.
- 612 [30] Bosco-Lauth AM, Hartwig AE, Porter SM, Gordy PW, Nehring M, Byas AD, et al.



- 613 Experimental infection of domestic dogs and cats with SARS-CoV-2: Pathogenesis,  
614 transmission, and response to reexposure in cats. *Proceedings of the National Academy*  
615 *of Sciences* 2020;117:26382-8.
- 616 [31] Zhou J, Li C, Liu X, Chiu MC, Zhao X, Wang D, et al. Infection of bat and human  
617 intestinal organoids by SARS-CoV-2. *Nature Medicine* 2020.
- 618 [32] Lau SKP, Woo PCY, Li KSM, Huang Y, Tsoi H-W, Wong BHL, et al. Severe acute  
619 respiratory syndrome coronavirus-like virus in Chinese horseshoe bats. *Proceedings of*  
620 *the National Academy of Sciences of the United States of America* 2005;102:14040.
- 621 [33] Ge X-Y, Li J-L, Yang X-L, Chmura AA, Zhu G, Epstein JH, et al. Isolation and  
622 characterization of a bat SARS-like coronavirus that uses the ACE2 receptor. *Nature*  
623 2013;503:535-8.
- 624 [34] Chu H, Chan JF-W, Yuen TT-T, Shuai H, Yuan S, Wang Y, et al. Comparative  
625 tropism, replication kinetics, and cell damage profiling of SARS-CoV-2 and SARS-  
626 CoV with implications for clinical manifestations, transmissibility, and laboratory  
627 studies of COVID-19: an observational study. *The Lancet Microbe* 2020;1:e14-e23.
- 628 [35] Tang Y-D, Li Y-M, Sun J, Zhang H-L, Wang T-Y, Sun M-X, et al. Cell entry of  
629 SARS-CoV-2 conferred by angiotensin-converting enzyme 2 (ACE2) of different  
630 species. *bioRxiv* 2020:2020.06.15.153916.
- 631 [36] Deng W, Bao L, Gao H, Xiang Z, Qu Y, Song Z, et al. Ocular conjunctival  
632 inoculation of SARS-CoV-2 can cause mild COVID-19 in rhesus macaques. *Nature*  
633 *Communications* 2020;11:4400.
- 634 [37] Monteil V, Kwon H, Prado P, Hagelkrüys A, Wimmer RA, Stahl M, et al. Inhibition  
635 of SARS-CoV-2 Infections in Engineered Human Tissues Using Clinical-Grade Soluble  
636 Human ACE2. *Cell* 2020;181:905-13.e7.
- 637 [38] Li W, Moore MJ, Vasilieva N, Sui J, Wong SK, Berne MA, et al. Angiotensin-  
638 converting enzyme 2 is a functional receptor for the SARS coronavirus. *Nature*  
639 2003;426:450-4.
- 640 [39] Walls AC, Park Y-J, Tortorici MA, Wall A, McGuire AT, Velesler D. Structure,  
641 Function, and Antigenicity of the SARS-CoV-2 Spike Glycoprotein. *Cell*  
642 2020;181:281-92.e6.
- 643 [40] Tortorici MA, Velesler D. Chapter Four - Structural insights into coronavirus entry.  
644 In: Rey F. A. (ed) *Advances in Virus Research*. Academic Press, 2019, 93-116.
- 645 [41] Simmons G, Gosalia DN, Rennekamp AJ, Reeves JD, Diamond SL, Bates P.  
646 Inhibitors of cathepsin L prevent severe acute respiratory syndrome coronavirus entry.  
647 *Proceedings of the National Academy of Sciences of the United States of America*  
648 2005;102:11876.
- 649 [42] Glowacka I, Bertram S, Müller MA, Allen P, Soilleux E, Pfefferle S, et al. Evidence  
650 that TMPRSS2 activates the severe acute respiratory syndrome coronavirus spike  
651 protein for membrane fusion and reduces viral control by the humoral immune response.  
652 *Journal of virology* 2011;85:4122-34.
- 653 [43] Matsuyama S, Nagata N, Shirato K, Kawase M, Takeda M, Taguchi F. Efficient  
654 Activation of the Severe Acute Respiratory Syndrome Coronavirus Spike Protein by  
655 the Transmembrane Protease TMPRSS2. *Journal of Virology* 2010;84:12658.
- 656 [44] Kleine-Weber H, Elzayat MT, Hoffmann M, Pöhlmann S. Functional analysis of



657 potential cleavage sites in the MERS-coronavirus spike protein. *Scientific Reports*  
658 2018;8:16597.

659 [45] Park J-E, Li K, Barlan A, Fehr AR, Perlman S, McCray PB, Jr., et al. Proteolytic  
660 processing of Middle East respiratory syndrome coronavirus spikes expands virus  
661 tropism. *Proceedings of the National Academy of Sciences of the United States of*  
662 *America* 2016;113:12262-7.

663 [46] Huang C, Wang Y, Li X, Ren L, Zhao J, Hu Y, et al. Clinical features of patients  
664 infected with 2019 novel coronavirus in Wuhan, China. *The Lancet* 2020;395:497-506.

665 [47] Daly JL, Simonetti B, Klein K, Chen KE, Williamson MK, Antón-Plágaro C, et al.  
666 Neuropilin-1 is a host factor for SARS-CoV-2 infection. *Science* 2020;370:861-5.

667 [48] Kumar S, Stecher G, Li M, Knyaz C, Tamura K. MEGA X: Molecular  
668 Evolutionary Genetics Analysis across Computing Platforms. *Molecular Biology and*  
669 *Evolution* 2018;35:1547-9.

670 [49] Letunic I, Bork P. Interactive Tree Of Life (iTOL) v4: recent updates and new  
671 developments. *Nucleic Acids Research* 2019;47:W256-W9.

672 [50] Li F, Li W, Farzan M, Harrison SC. Structure of SARS Coronavirus Spike  
673 Receptor-Binding Domain Complexed with Receptor. *Science* 2005;309:1864-8.

674 [51] Bordoli L, Kiefer F, Arnold K, Benkert P, Battey J, Schwede T. Protein structure  
675 homology modeling using SWISS-MODEL workspace. *Nature Protocols* 2009;4:1-13.

676 [52] Schrodinger, LLC (2015), 'The PyMOL Molecular Graphics System, Version 1.8'.

677

## 678 **Figure legends**

679 **Figure 1. Predicted bonding affinities between ACE2 of 247 jawed vertebrates and**  
680 **the RBD of the S protein of SARS-COV-2. Linked to Figure S1. A.** ACE2 protein  
681 tree 247 vertebrates with affinity fold change relative to hACE2. Red bars indicated  
682 higher affinity ( $1/K_d$ ) than hACE2. Green bars indicated lower affinity ( $1/K_d$ ) than  
683 hACE2. **B.** Enrichment analysis of affinity phenotypes in Mammalia, Actinopteri, and  
684 Aves using Fisher exact test under p-value  $<0.05$  corrected by Benjamini-Hochberg  
685 (BH) method. **C.** ACE2 protein tree 127 mammals with affinity fold change relative to  
686 hACE2. Red bars indicated higher affinity ( $1/K_d$ ) than hACE2. Green bars indicated  
687 lower affinity ( $1/K_d$ ) than hACE2. **D.** Enrichment analysis of affinity phenotypes in  
688 Carnivora, Artiodactyla, Primates, Chiroptera, and Rodentia orders from mammals  
689 using Fisher exact test under p-value  $<0.05$  corrected by the BH method.

690 **Figure 2. Amino acid changes corresponding to high-or-low affinity phenotypes**  
691 **from 247 vertebrates. Linked to Figure S3. A.** Amino acid (AA) changes  
692 corresponding to high-or-low affinity phenotypes in top 3 high and 3 low affinity hosts  
693 from Actinopteri, Aves, Mammalia classes. High affinity AA changes were marked by  
694 red color, low affinity AA changes were marked by green color. High-or-low affinity

695 associated AA changes were shared by at least two species with consistent phenotype  
696 but absent in reverse phenotype. For *Latimeria chalumnae* and *Scyliorhinus torazame*,  
697 affinity-associated AA changes were based on the AA combination of Actinopteri, Aves,  
698 Mammalia classes. Heatmap indicated the fold change in bonding affinity relative to  
699 hACE2 when replaced hACE2 with the affinity-associated AA changes from the  
700 corresponding non-human animals. Positive values in heatmap mean increase folds and  
701 negative values mean decreased folds relative to hACE2. **B.** Composition of AA  
702 changes leading to top high or low affinity combined with predicted affinities of  
703 mutated hACE2 in Actinopteri, Aves, and Mammalia classes. **C.** Frequency of specific  
704 amino acid changes linked to high-or-low affinities in Actinopteri, Aves, Mammalia  
705 classes across different vertebrate lineages.

706 **Figure 3. Amino acid characteristics at eight conserved amino acid sites leading to**  
707 **high-or-low affinity divergence in 247 vertebrates. Linked to Figures S4-S8. A.**  
708 Frequency of amino acid residues at eight conserved amino acid sites in mammalian  
709 hosts and non-mammalian hosts contributing to different affinity phenotypes after  
710 mutated in hACE2 independently. Higher than wild hACE2 affinity marked by red;  
711 equal to hACE2 by blue; and lower than hACE2 by green. **B.** Affinity renversement of  
712 low-affinity animal hosts when related amino acids were replaced by high-affinity  
713 amino acid group (19N,27N,30Q,41Y,79Q, and 82T). The 1-5 vertebrates with affinity  
714 equal to wild hACE2 affinity and 6-157 vertebrates with affinity lower than wild  
715 hACE2 affinity. 41H to Y was used as control to eliminate the effect of 41H linked to  
716 extreme low affinity. **C.** Affinity renversement of high-affinity animal hosts when  
717 related amino acids were replaced by low affinity amino acid group  
718 (19L,24Del,27A,34N,41H,79M and 82M. The 1-90 vertebrates with affinity higher  
719 than wild hACE2 affinity and 91-95 vertebrates with affinity equal to wild hACE2  
720 affinity. 41Y to H was used as control due to its contribution to extreme low affinity.

721 **Figure 4. 3D complex structure corresponding to key amino acid changes**  
722 **associated with affinity divergence. Linked to Figure 3.** 3D complex structures were  
723 reconstructed based on those key amino acid changes resulting in high-or-low affinity  
724 divergence. Amino acids from wild hACE2 was marked by golden color. In brackets,  
725 high-or-low-affinity associated amino acid residues were marked by green. Amino  
726 acids and structures marked by blue color belonged to the RBD of the S protein of  
727 SARS-CoV-2.

728

729

730 **Supplemental Information**

731 **Figure S1.  $K_d$  value details across 247 vertebrates. Linked to Figure 1. A.** ACE2  
732 protein tree of 247 vertebrates with  $K_d$  value. Bar height indicated value of  $\log_2.1(K_d)$ .

733 **B.**  $K_d$  distribution of all host species in each different class of 247 vertebrate hosts. **C.**  
734 ACE2 protein tree of 127 mammals with  $K_d$  value. Bar height indicated value of  
735  $\log_2.1(K_d)$ . **D.**  $K_d$  distribution of all host species in each order of mammals.

736 **Figure S2. Relative to wild-type (WT) hACE2, affinity changes of mutated (MT)**  
737 **hACE2 based on co-occurring amino acid changes of 247 vertebrates at 22 known**  
738 **contact amino acid sites[12].** Affinity changes were normalized using  $\log_2$ .

739 **Figure S3. Affinity phenotype reversal after crossed replacements between high-**  
740 **or-low affinity animal species and those animal species in the same lineage with**  
741 **converse phenotypes. Linked to Figure 2. WT** means affinity fold change of WT  
742 ACE2 relative to wild type (WT) hACE2. As controls, **MT in hACE2** means affinity  
743 change of mutated (MT) hACE2 using affinity-associated amino acid residues from  
744 four animal lineages relative to WT hACE2. Relative to the affinity of WT ACE2 of a  
745 given animal species, **MT1-MT3/WT** means affinity change of ACE2 of the animal  
746 species replaced by affinity-associated amino acid residues from the first animal species  
747 with converse phenotype in same class.

748 **Figure S4. MT-hACE2 affinity changes relative to WT hACE2 following step by**  
749 **step replacement in hACE2 with amino acids at affinity-associated sites from top**  
750 **3 high affinity hosts (left panel) and top 3 low affinity hosts (right panel) in**  
751 **Actinopteri. Linked to Figures 2 and 3.**

752 **Figure S5. MT-hACE2 affinity changes relative to WT hACE2 following step by**  
753 **step replacement in hACE2 with amino acids at affinity-associated sites from top**  
754 **3 high affinity hosts (left panel) and top 3 low affinity hosts (right panel) in Aves.**

755 **Figure S6. MT-hACE2 affinity changes relative to WT hACE2 following step by**  
756 **step replacement in hACE2 with amino acids at affinity-associated sites from top**  
757 **3 high affinity hosts (left panel) and top 3 low affinity hosts (right panel) in**  
758 **mammals. Linked to Figures 2 and 3.**

759 **Figure S7. In two ancient jaw vertebrates (left panel: Coelacanthimorpha; right**  
760 **panel: Chondrichthyes), MT-hACE2 affinity changes relative to WT hACE2**  
761 **following step by step replacement in hACE2 with amino acids linked to affinity-**  
762 **associated sites based on the integration of Actinopteri, Aves, and Mammalian**  
763 **classes in Figures S4-S6. Linked to Figures 2 and 3.**

764 **Figure S8. Distribution of amino acid variations at 8 conserved loci across 247**  
765 **jawed vertebrates. Linked to Figures 2 and 3.**

766 **Table S1. Details of affinity prediction between ACE2 PD from 247 vertebrates**  
767 **and the RBD of the S protein of SARS-COV-2. Linked to Figure 1.**

768

**Figure 1**

**A**

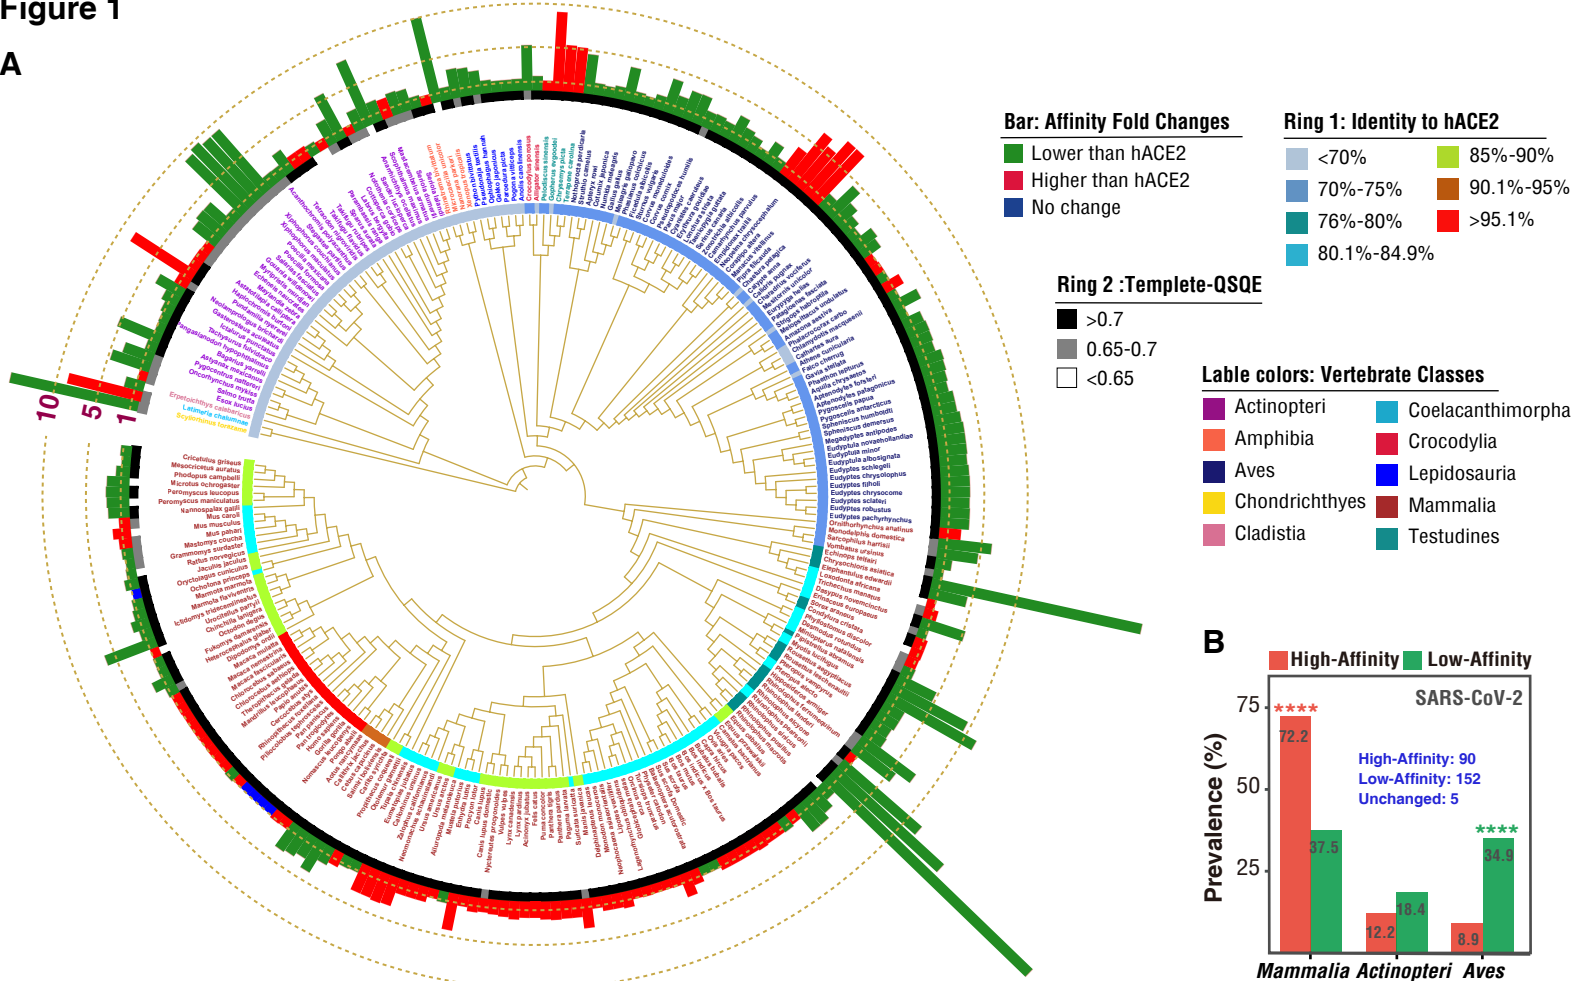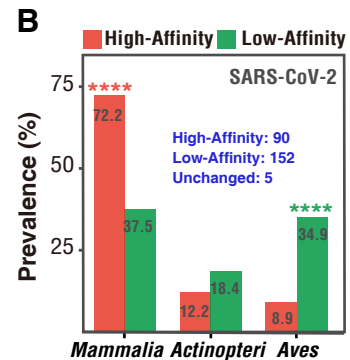

**C**

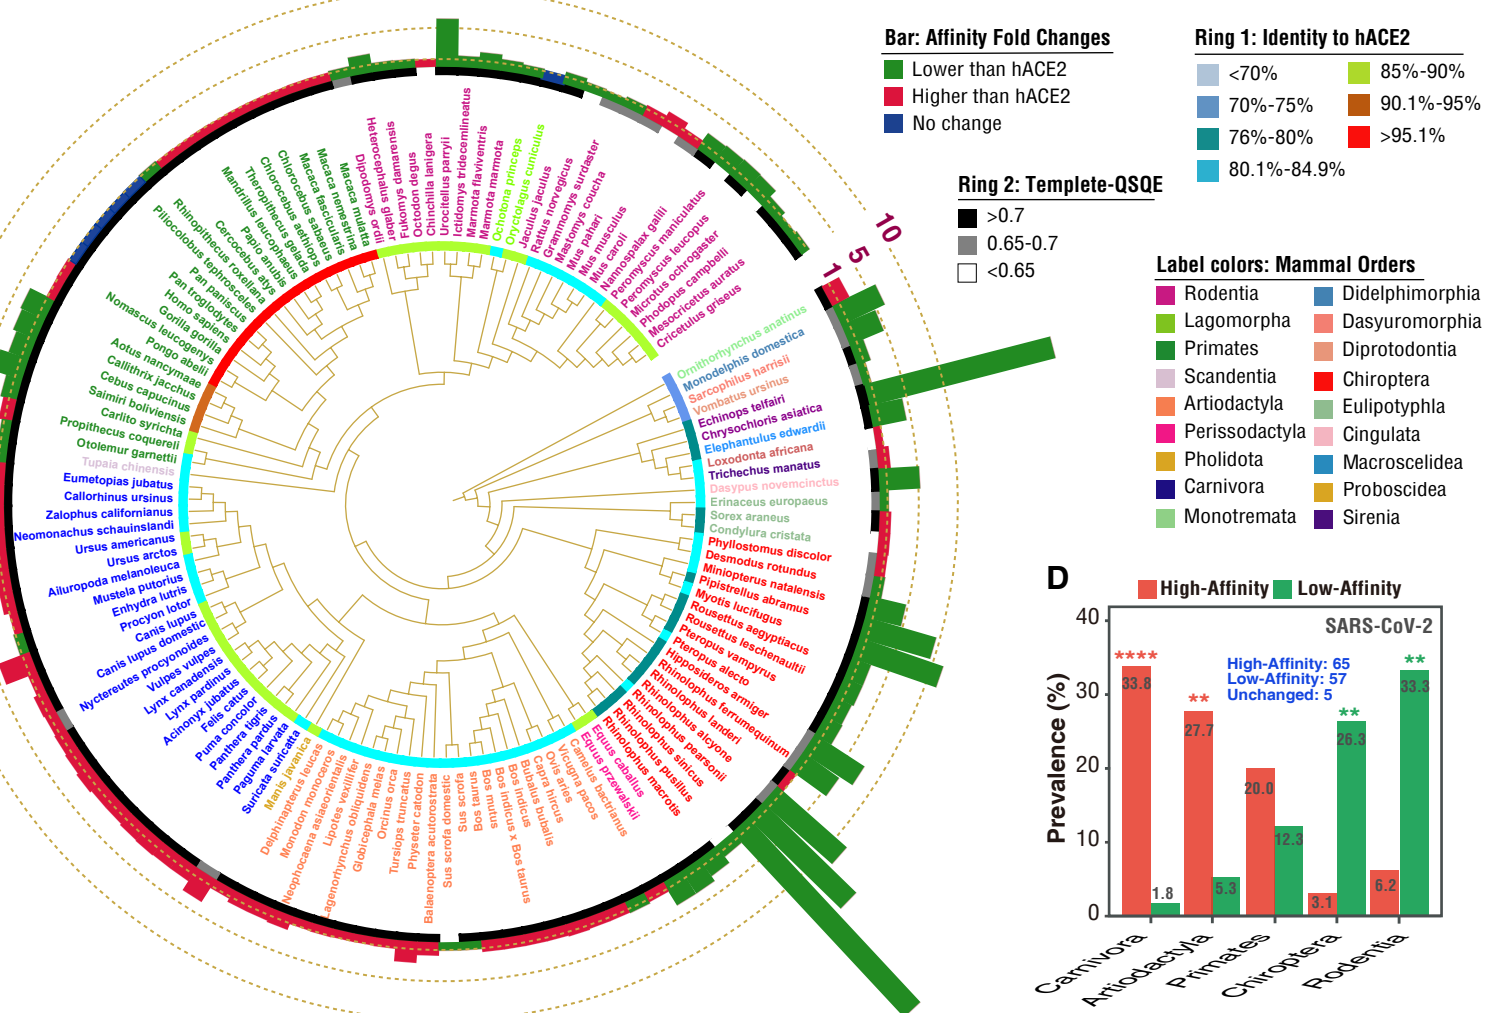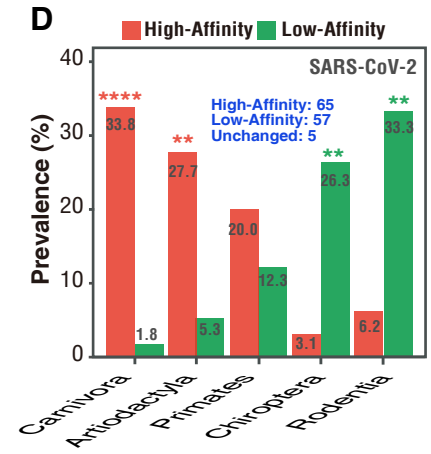



**Figure 2**

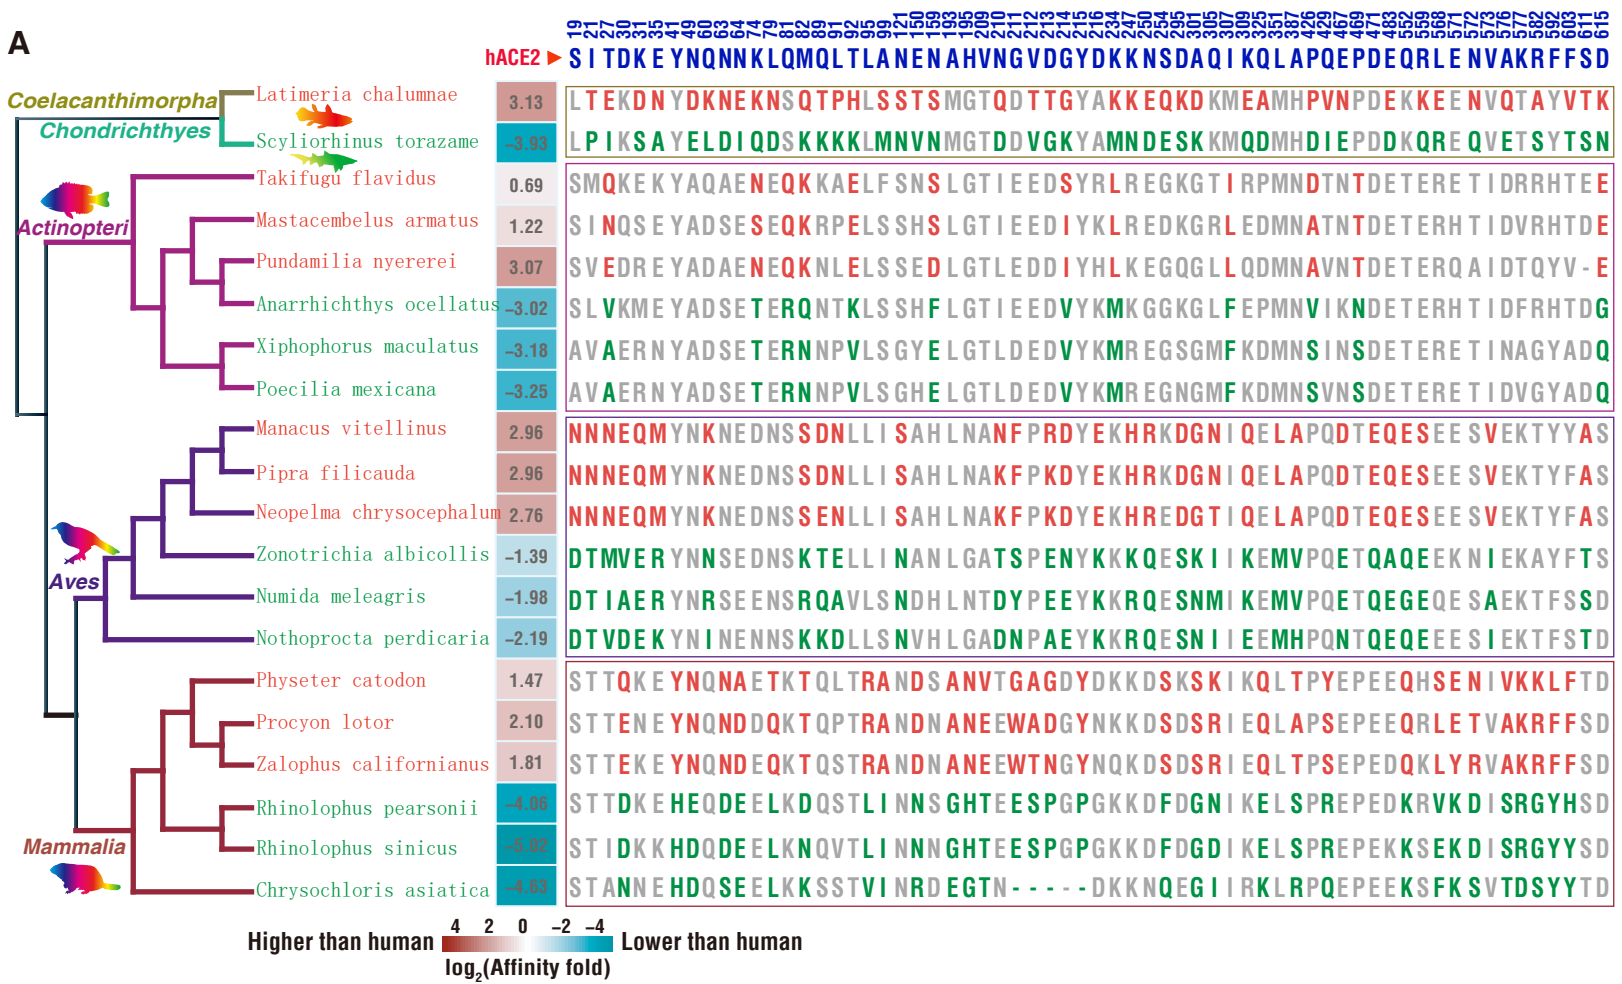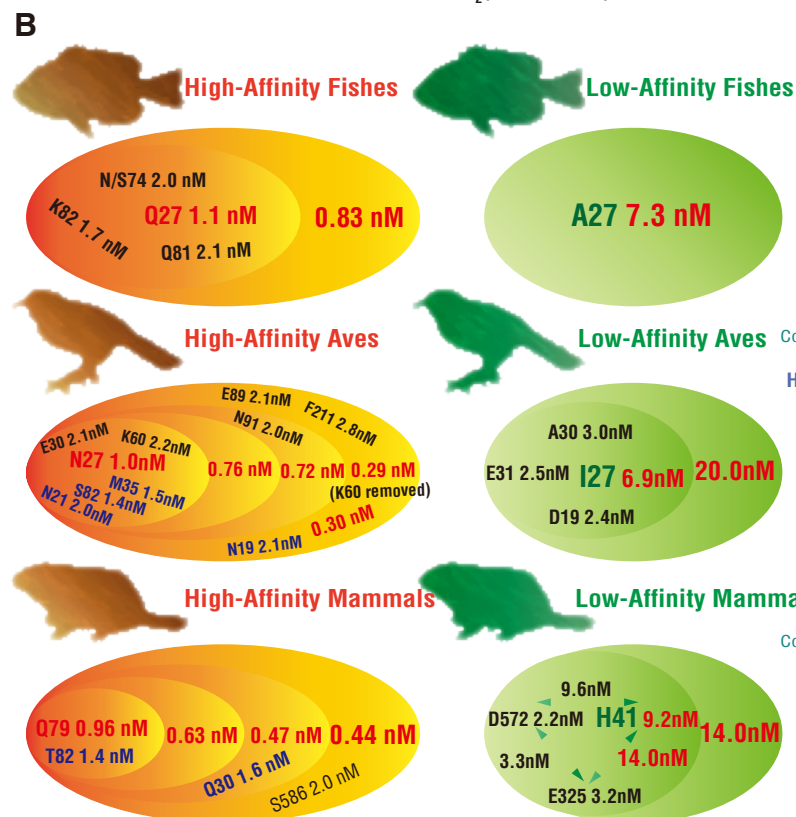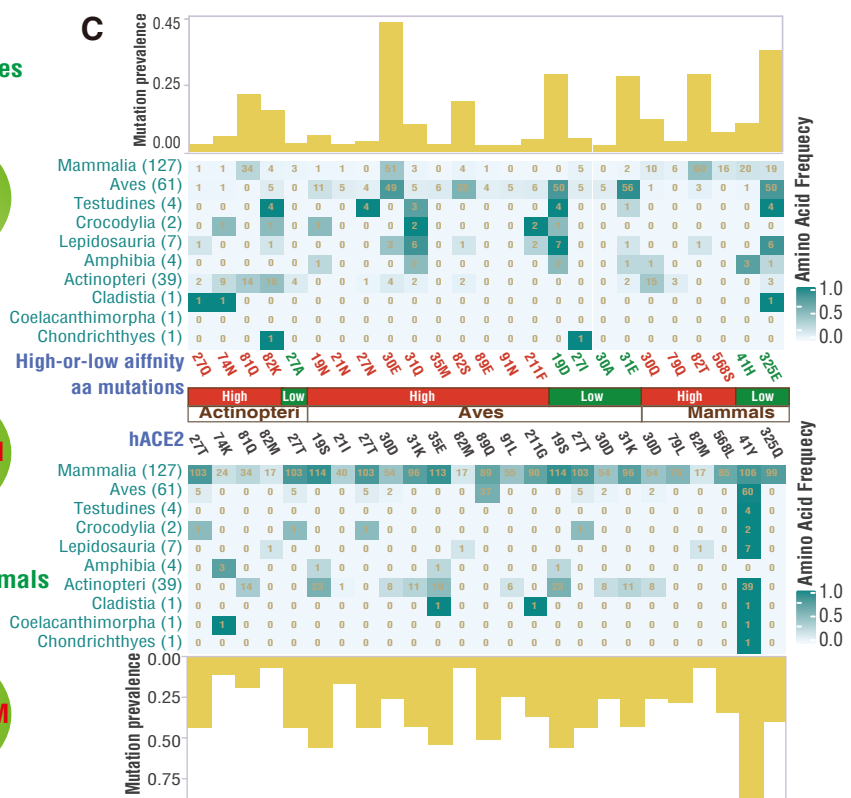



Figure 3

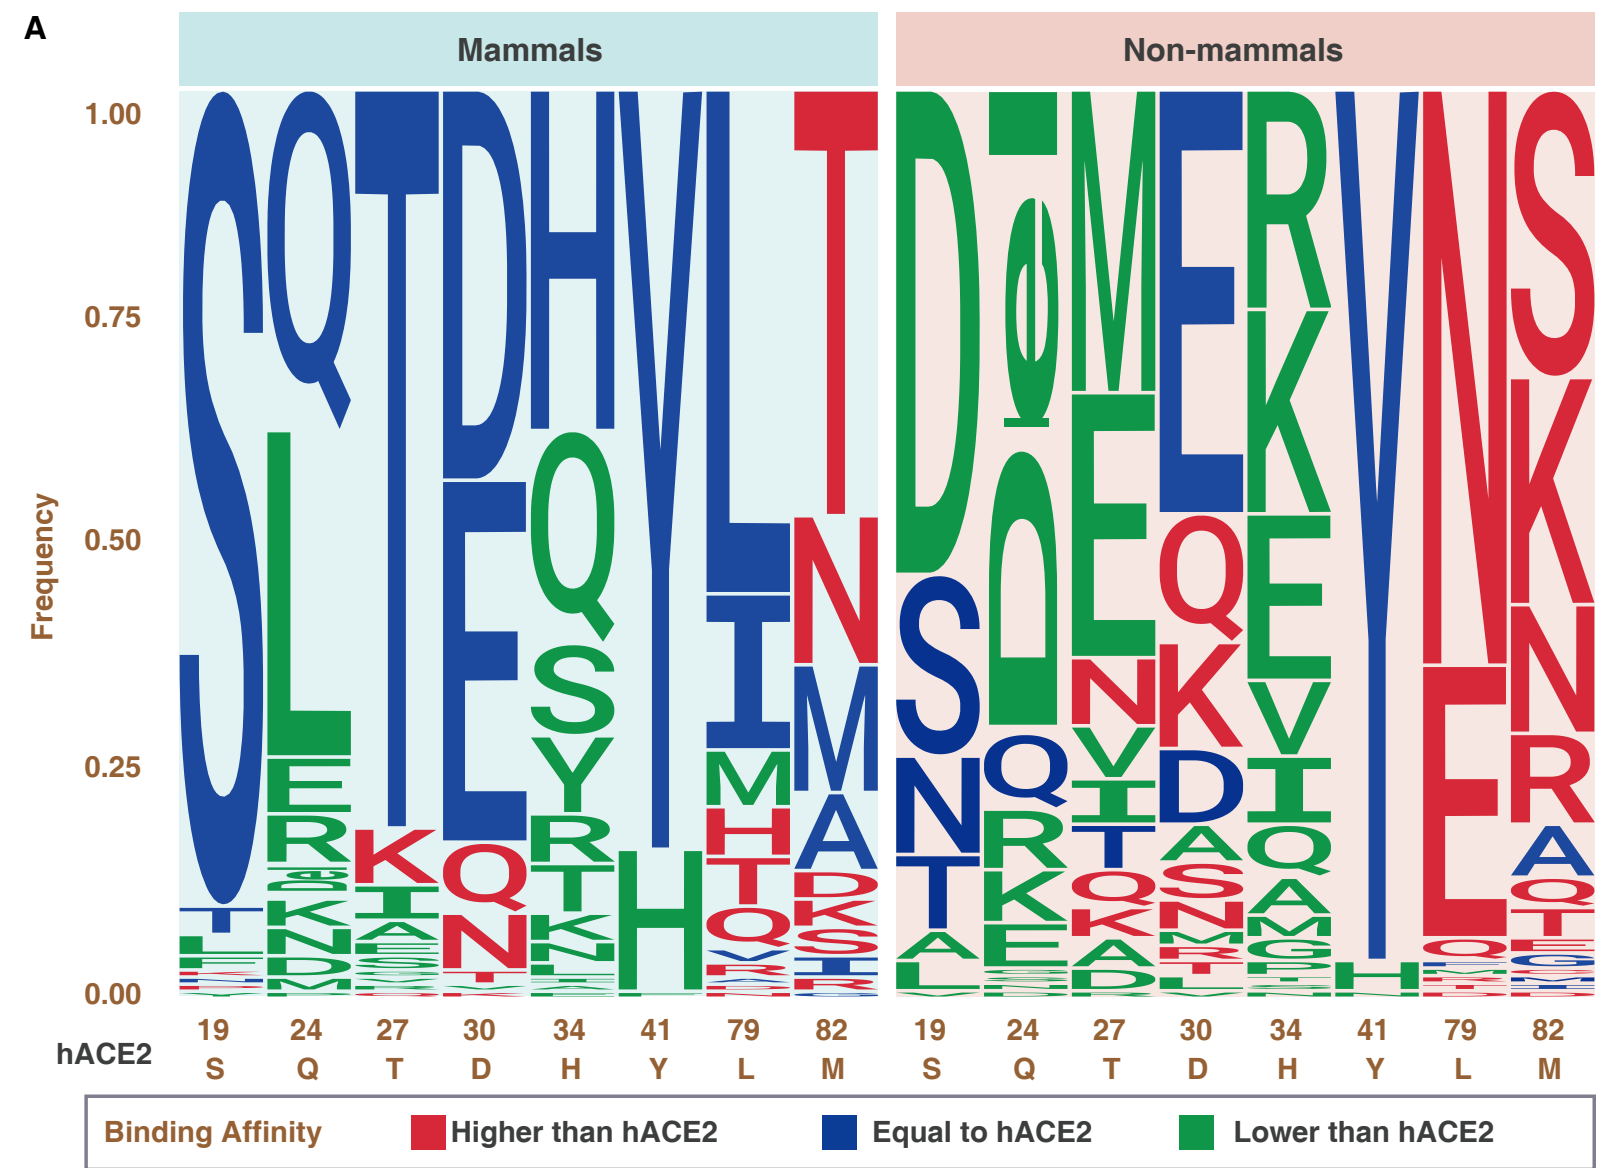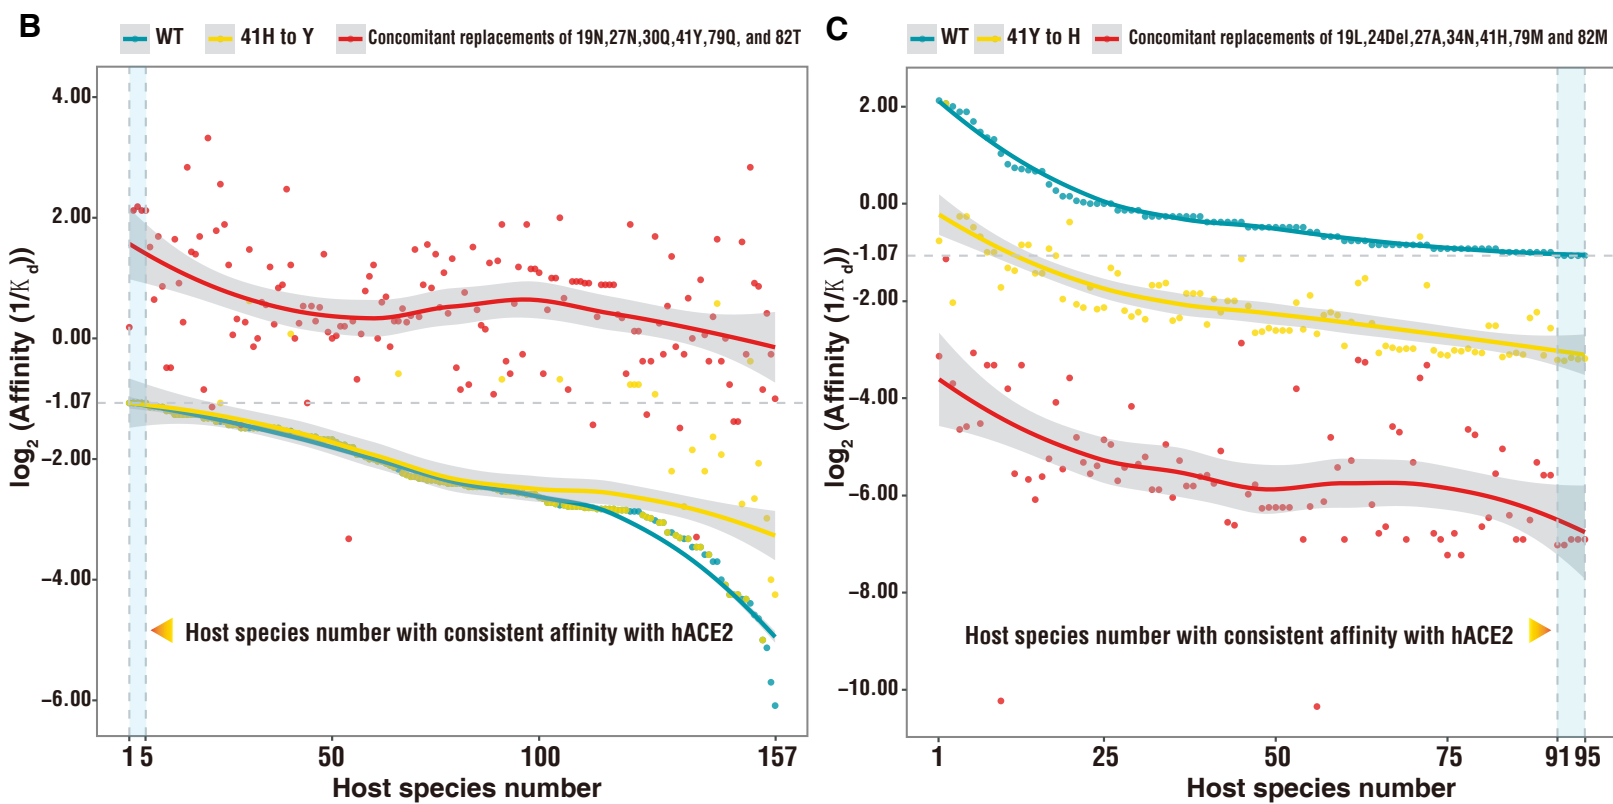

Figure 4

$K_d$  (wild hACE2) = 2.1nM

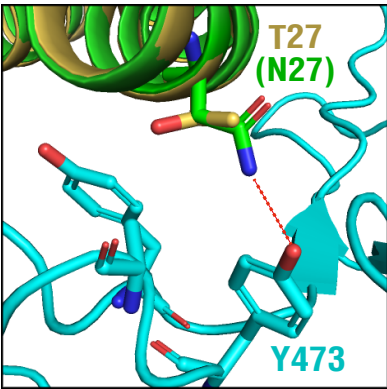

$K_d = 1.0nM$

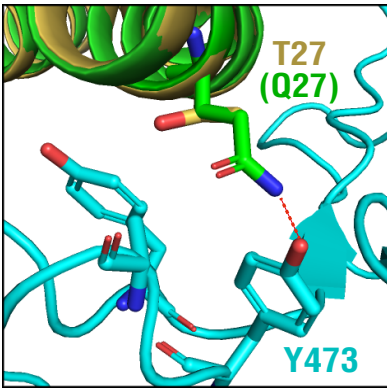

$K_d = 1.1nM$

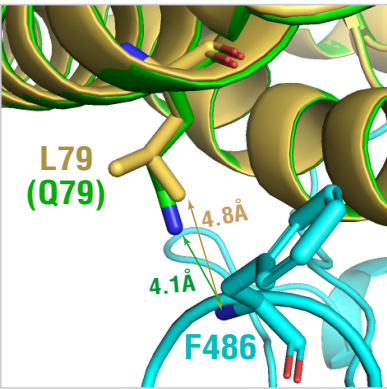

$K_d = 1.0nM$

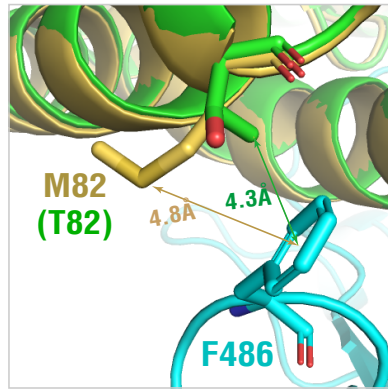

$K_d = 1.4nM$

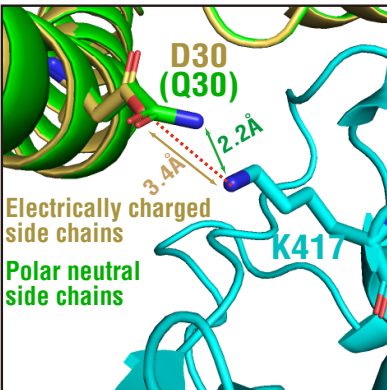

$K_d = 1.6nM$

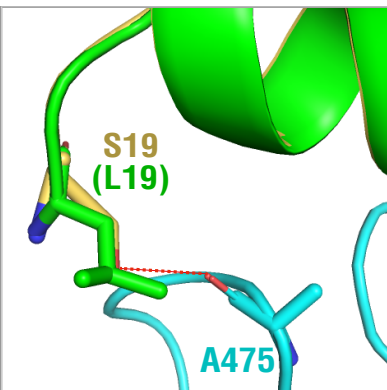

$K_d = 3.3nM$

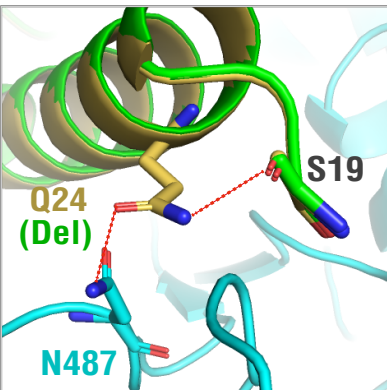

$K_d = 4.3nM$

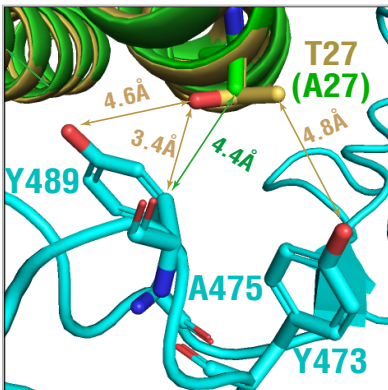

$K_d = 7.3nM$

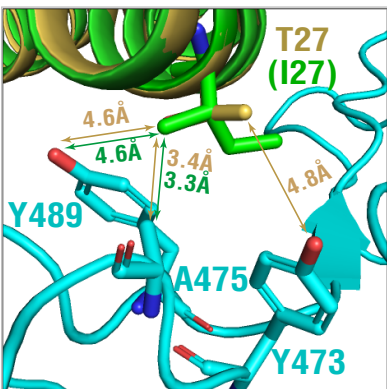

$K_d = 6.9nM$

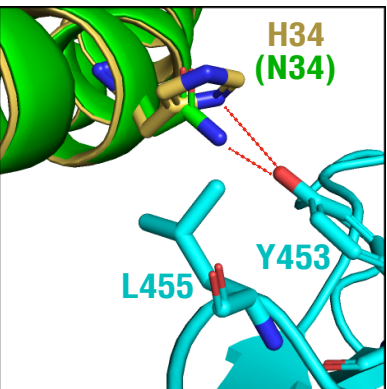

$K_d = 2.7nM$

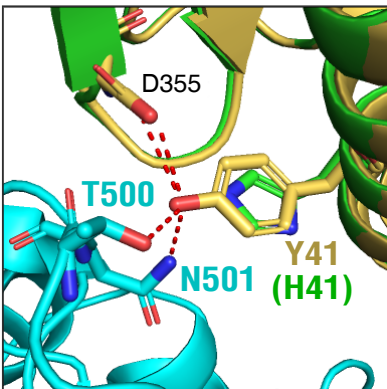

$K_d = 9.2nM$

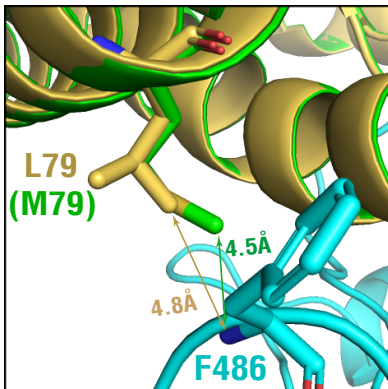

$K_d = 2.2nM$

Figure S1

A

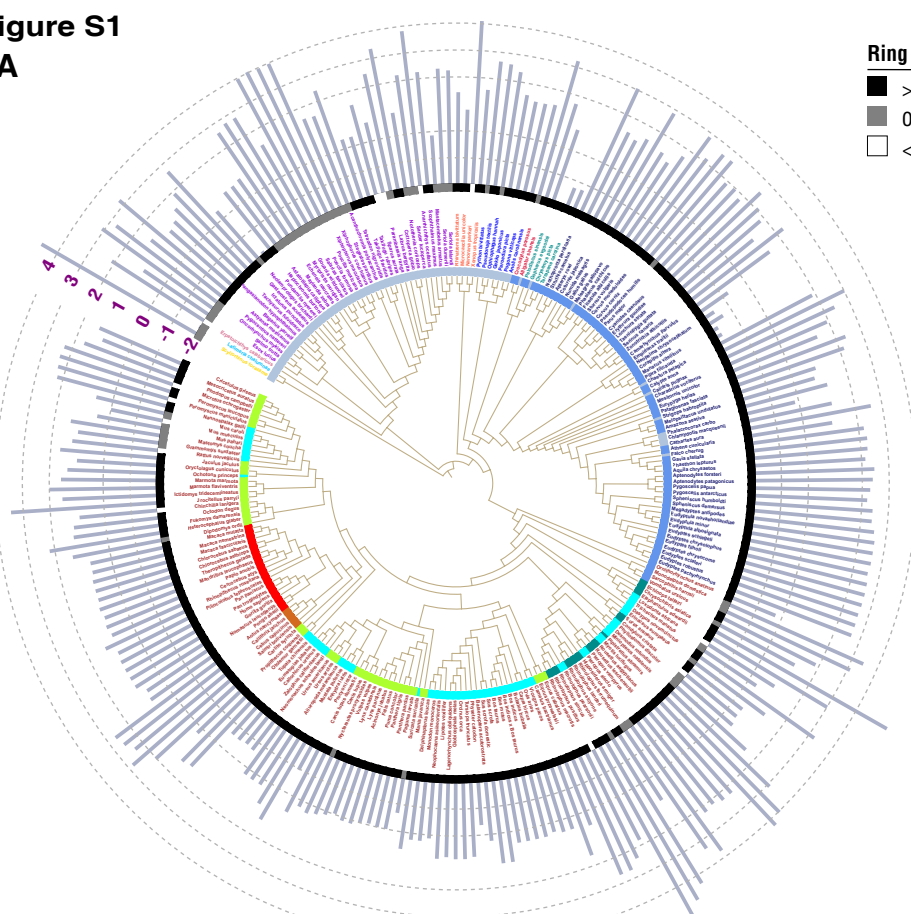

Ring 2 :Template-QSQE

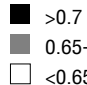

Lable colors: Vertebrate Classes

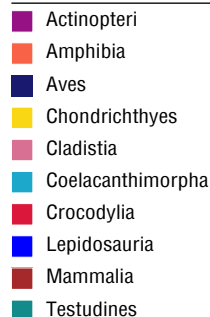

Bar:  $\log_2.1(K_d)$

Ring 1 : Identity to hACE2

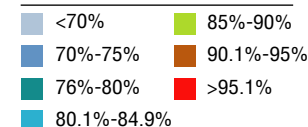

B

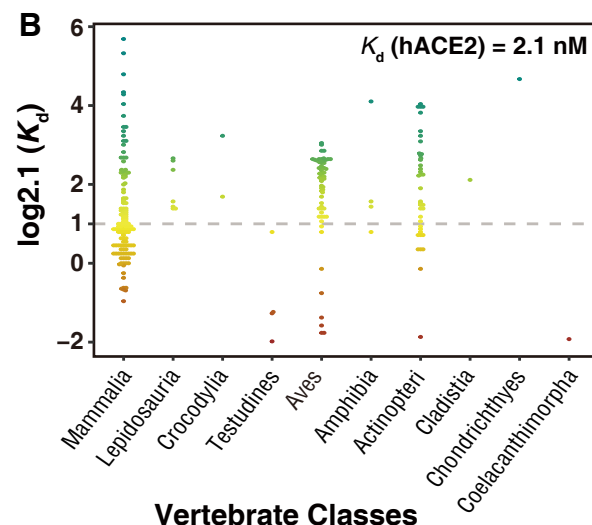

C

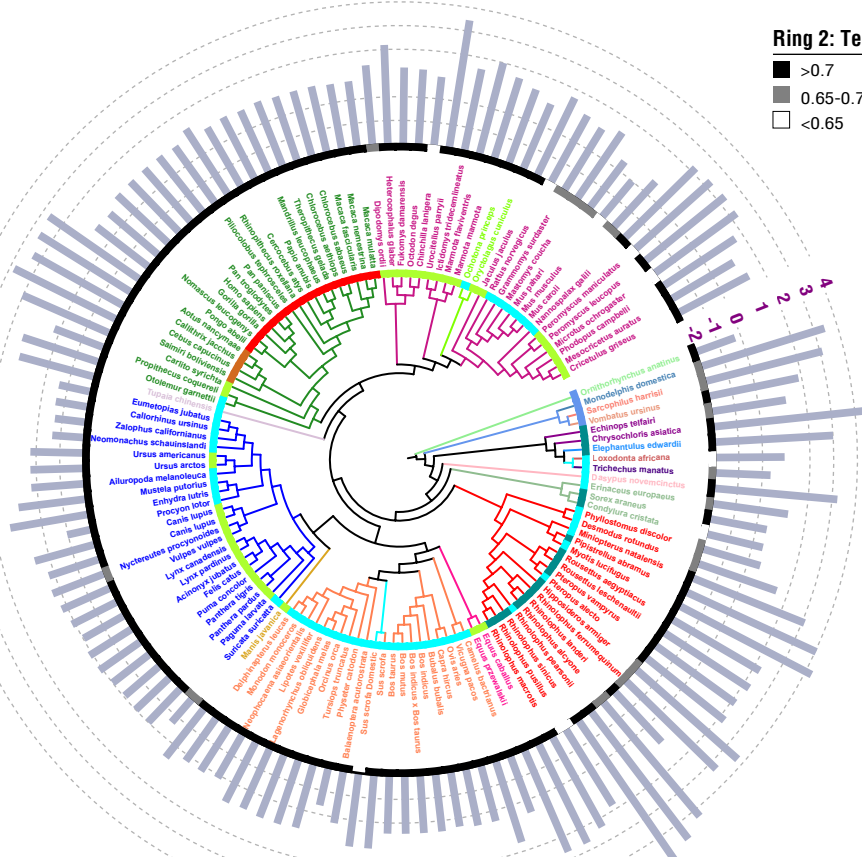

Ring 2: Template-QSQE

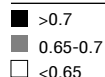

Label colors: Mammal Orders

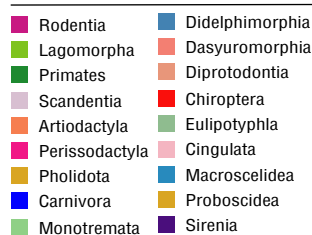

Ring 1: Identity to hACE2

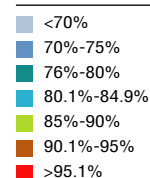

Bar: Affinity  $\log_2.1(K_d)$

Affinity with SAR-CoV-2

D

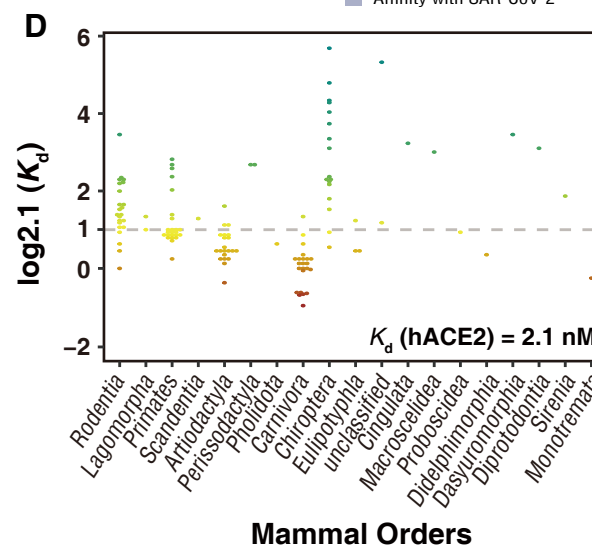

Mammal Orders

Figure S2

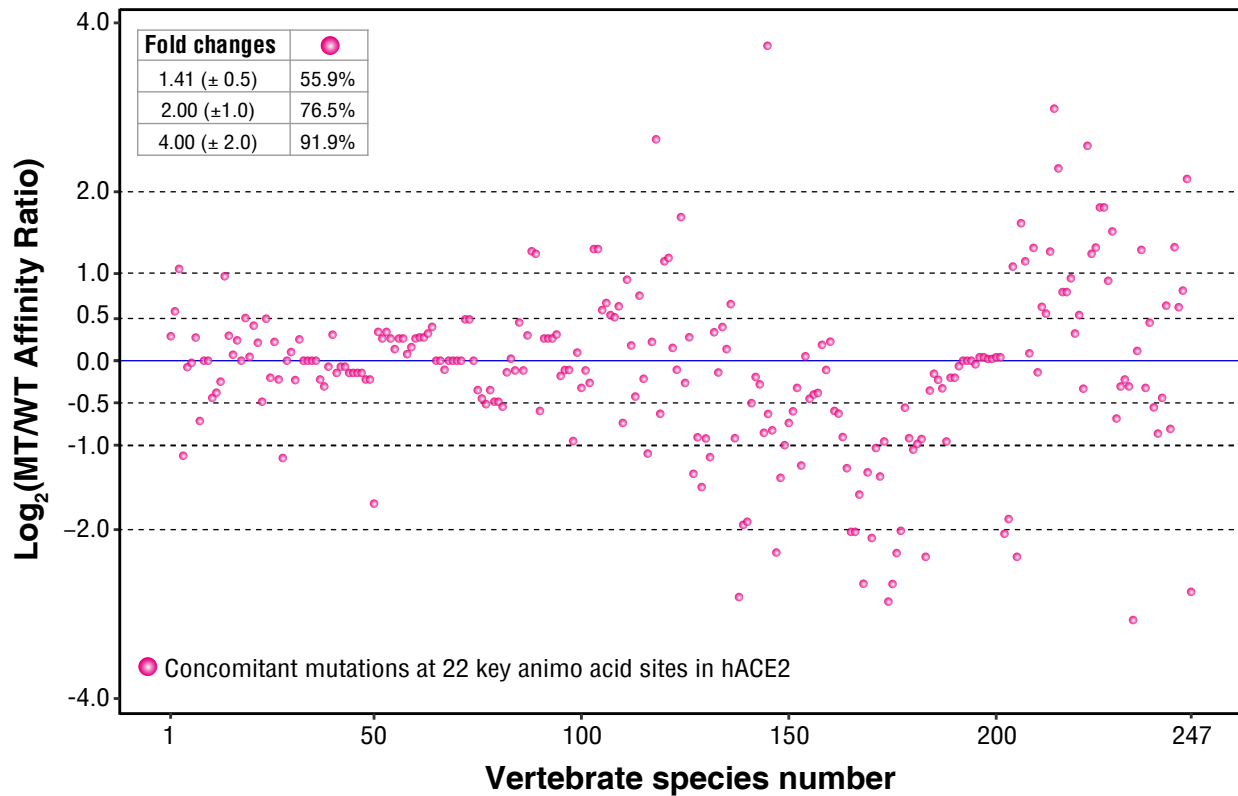

Figure S3

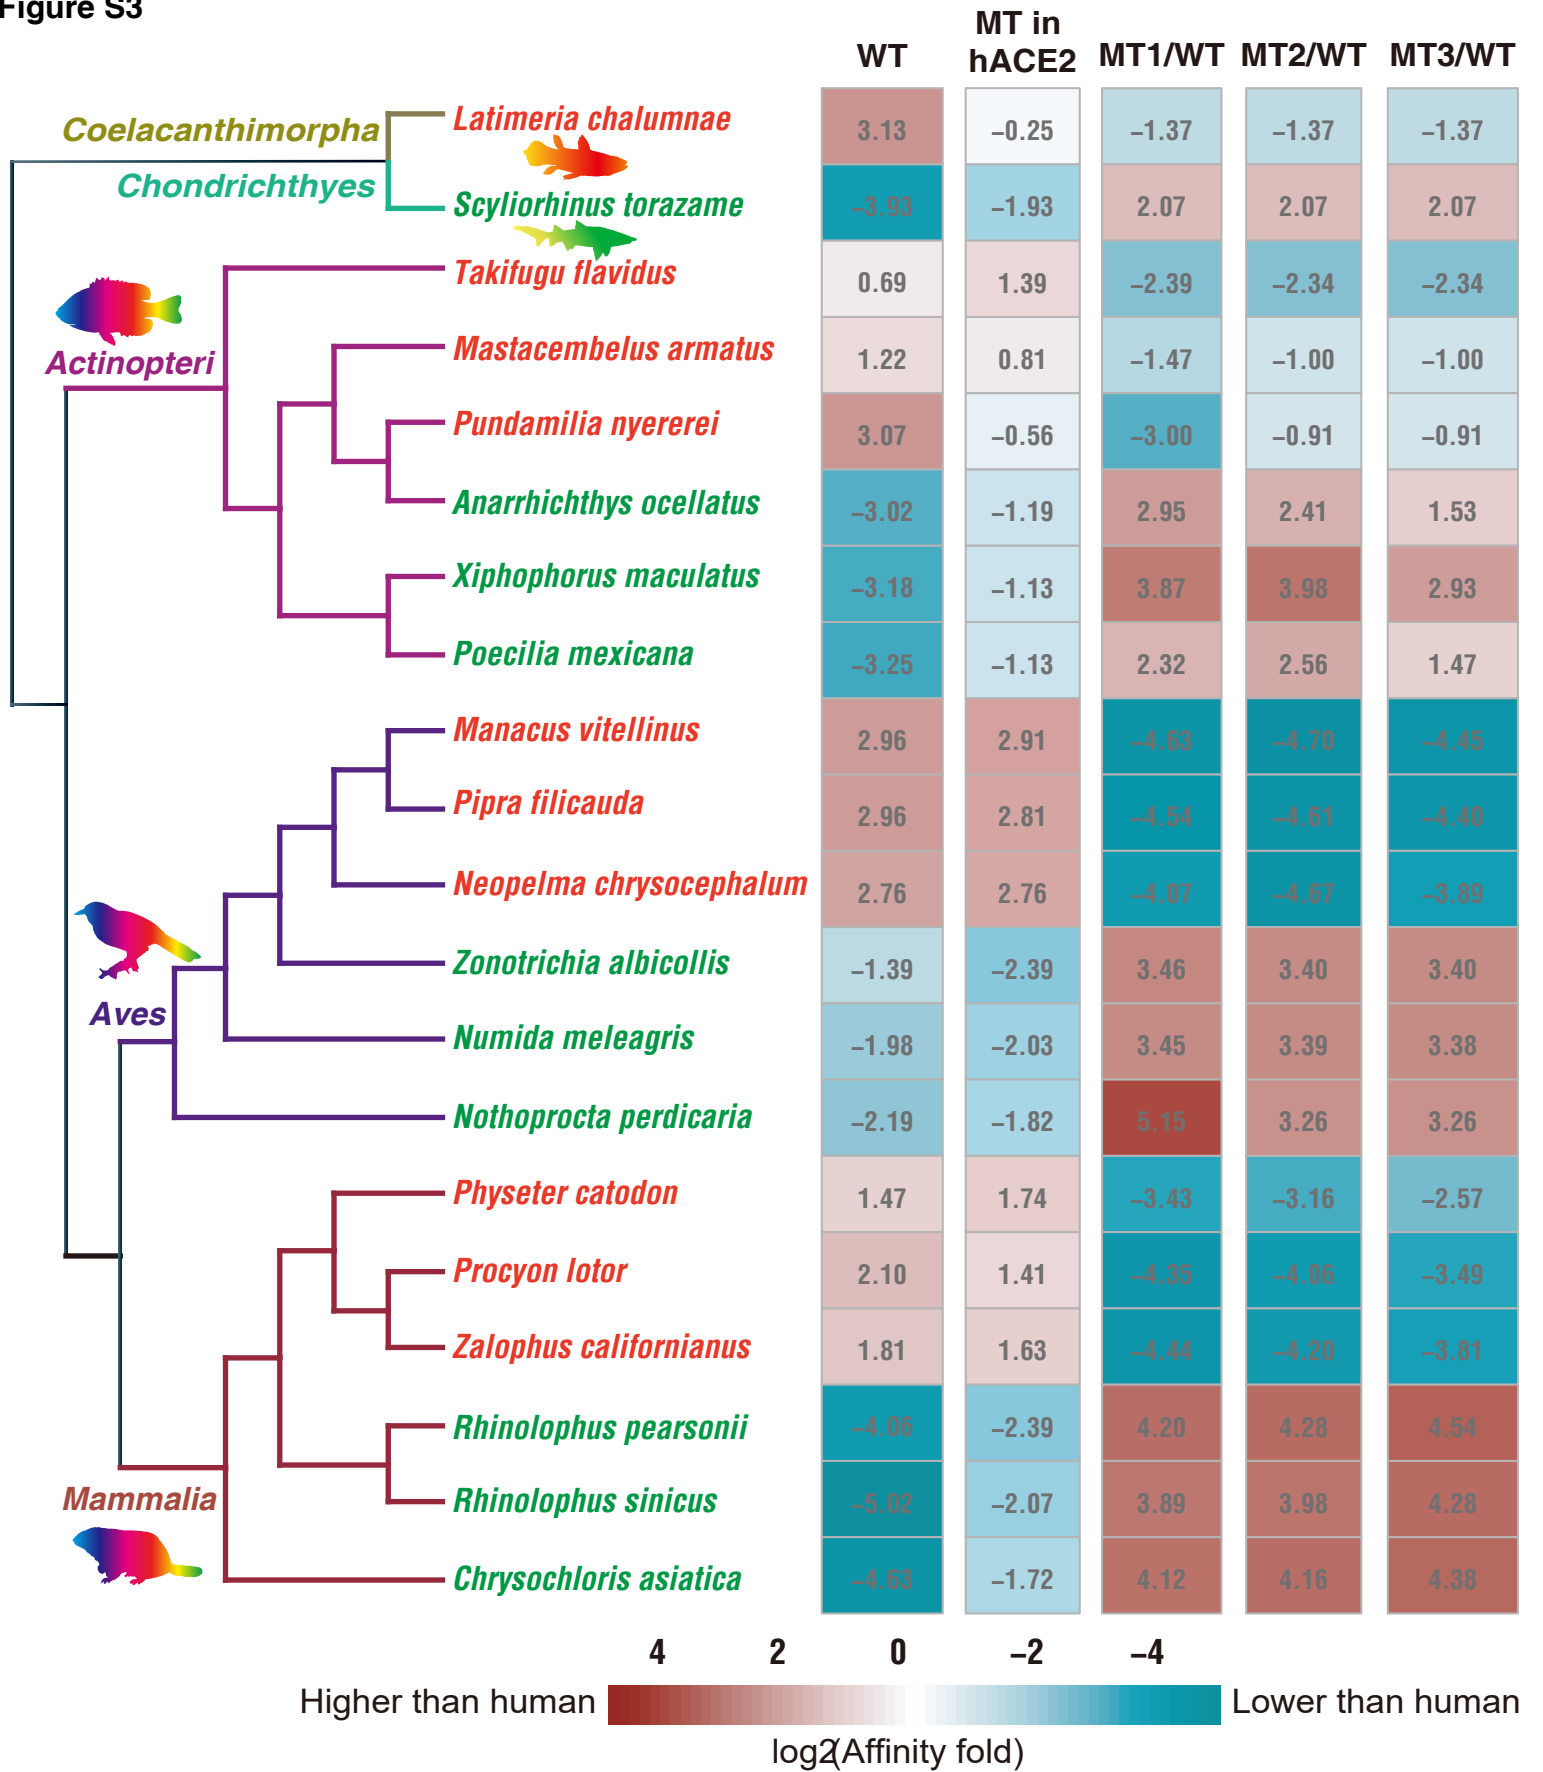



**Figure S4**27 74 81 82 92 159 214 234 307 426 469 615  
TKQMTNGK I P P D

|              |
|--------------|
| QNQKESSLIDTE |
| ENQKEDILLATE |
| NSQKESILLATE |
| QNQKESSLIDT  |
| ENQKEDILLAT  |
| NSQKESILLAT  |
| QNQKESSLID   |
| ENQKEDILLA   |
| NSQKESILLA   |
| QNQKESSLI    |
| ENQKEDILL    |
| NSQKESILL    |
| QNQKESSL     |
| ENQKEDIL     |
| NSQKESIL     |
| QNQKESS      |
| ENQKEDI      |
| NSQKESI      |
| QNQKES       |
| ENQKED       |
| NSQKES       |
| QNQKE        |
| ENQKE        |
| NSQKE        |
| QNQK         |
| ENQK         |
| NSQK         |
| QNQ          |
| ENQ          |
| NSQ          |
| QN           |
| EN           |
| NS           |
| Q            |
| E            |
| N            |

Stepwise Mutations  
in hACE2**Candidate high-affinity aa changes of ACE2 in fish species**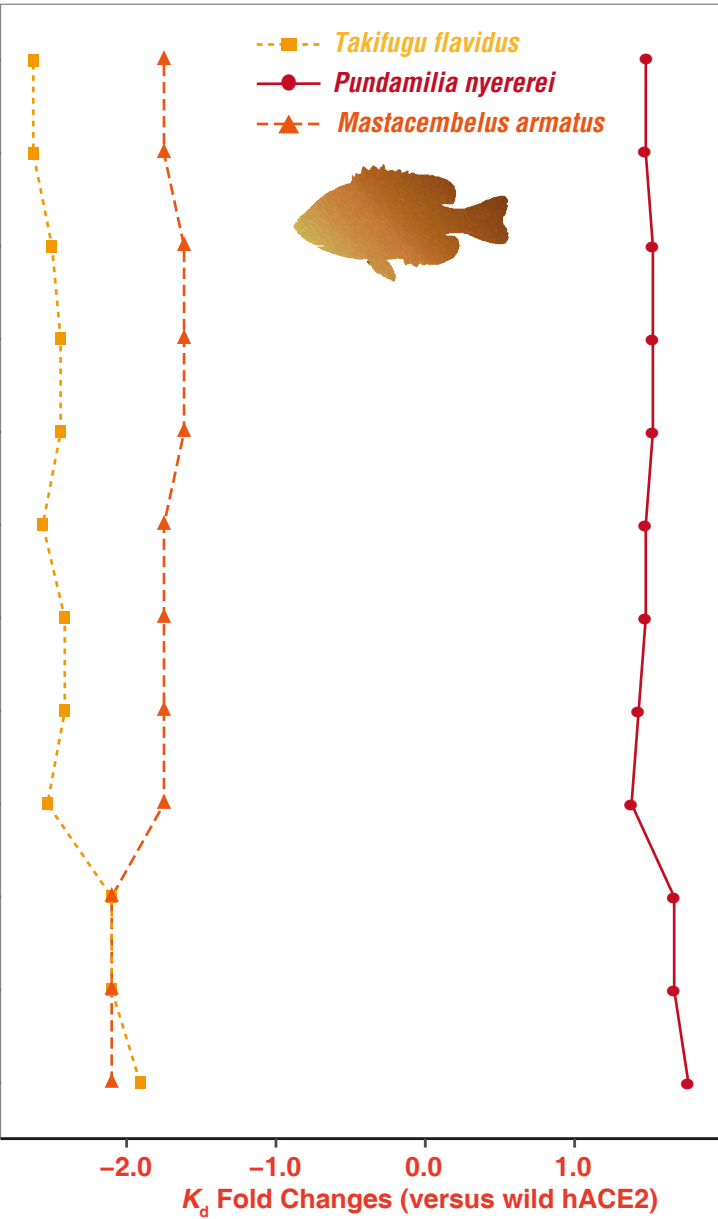hACE2  
sites**Candidate low-affinity aa changes of ACE2 in fish species**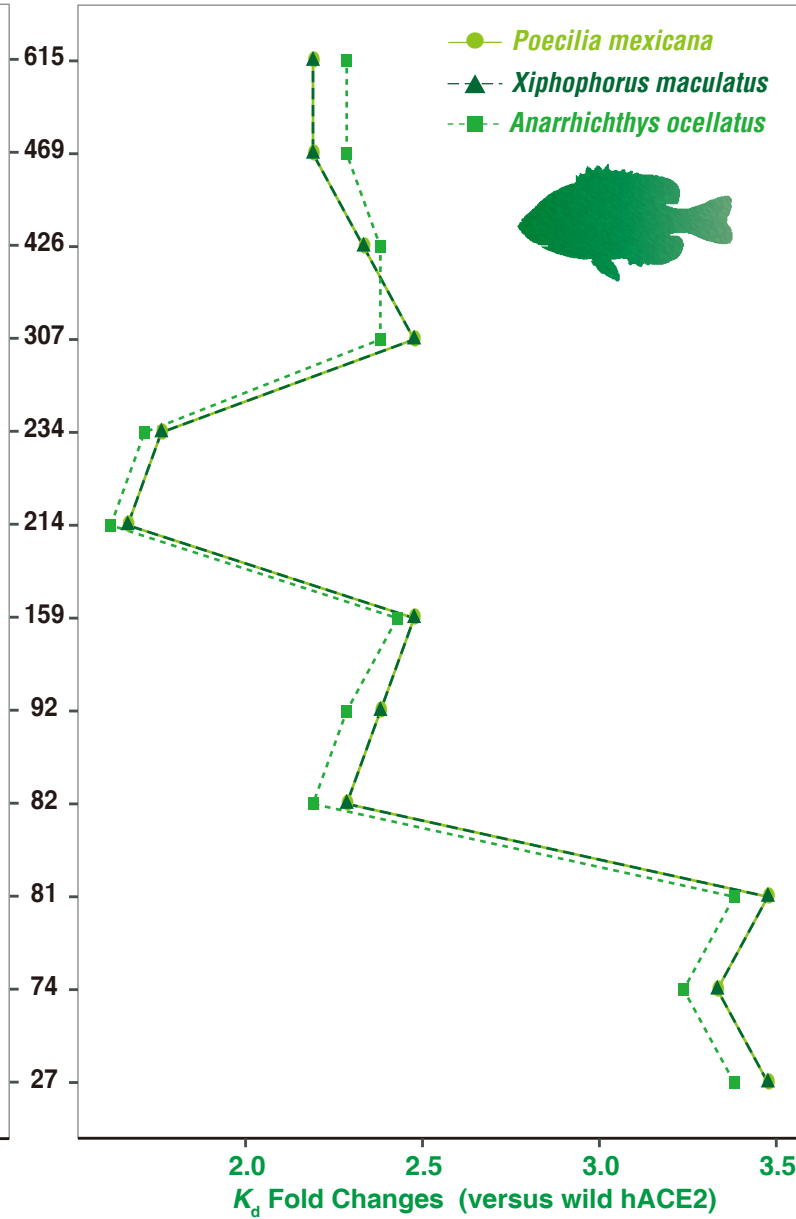27 74 81 82 92 159 214 234 307 426 469 615  
TKQMTNGK I P P D

|              |
|--------------|
| ATRNVEVMFSSQ |
| ATRNVEVMFSSQ |
| VTRQKFVMFVNG |
| ATRNVEVMFSS  |
| ATRNVEVMFSS  |
| VTRQKFVMFVN  |
| ATRNVEVMFS   |
| ATRNVEVMFS   |
| VTRQKFVMFV   |
| ATRNVEVMF    |
| ATRNVEVMF    |
| VTRQKFVMF    |
| ATRNVEVM     |
| ATRNVEVM     |
| VTRQKFVM     |
| ATRNVEV      |
| ATRNVEV      |
| VTRQKFV      |
| ATRNVE       |
| ATRNVE       |
| VTRQKF       |
| ATRN         |
| VTRQ         |
| ATR          |
| ATR          |
| VTR          |
| AT           |
| AT           |
| VT           |
| A            |
| A            |
| V            |

Stepwise Mutations  
in hACE2





Figure S6

Candidate high-affinity aa changes of ACE2 in mammals

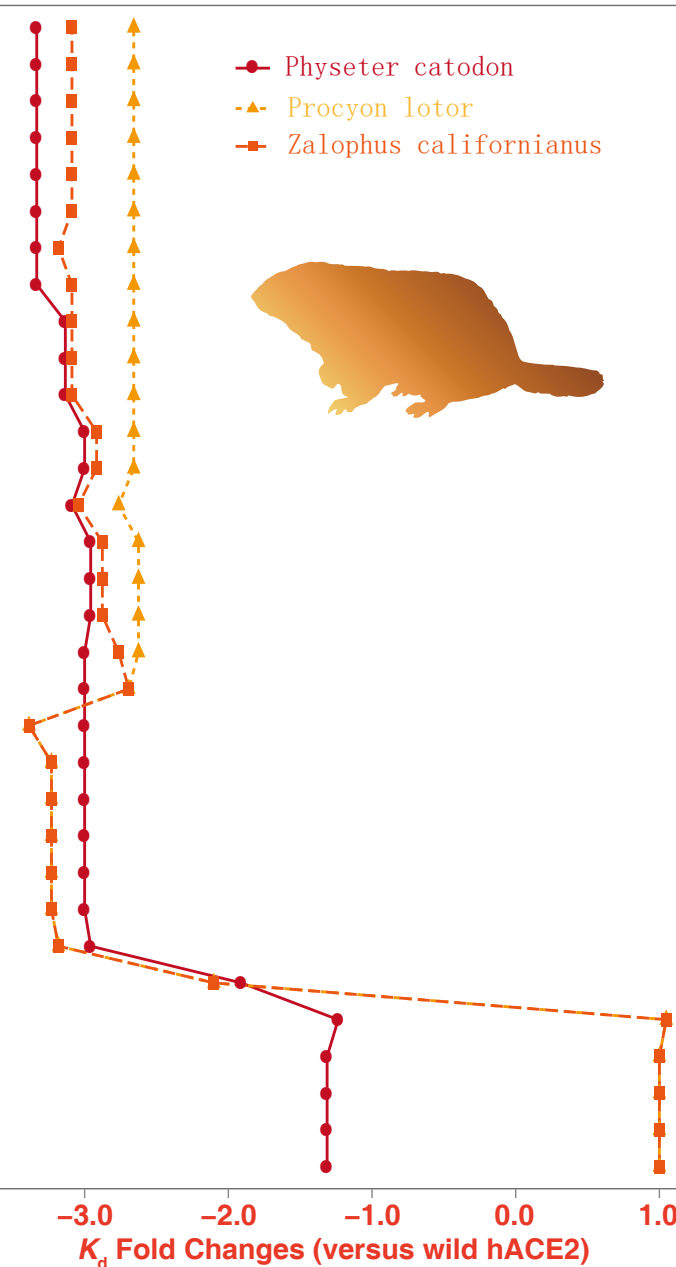

hACE2 sites

Candidate low-affinity aa changes of ACE2 in mammals

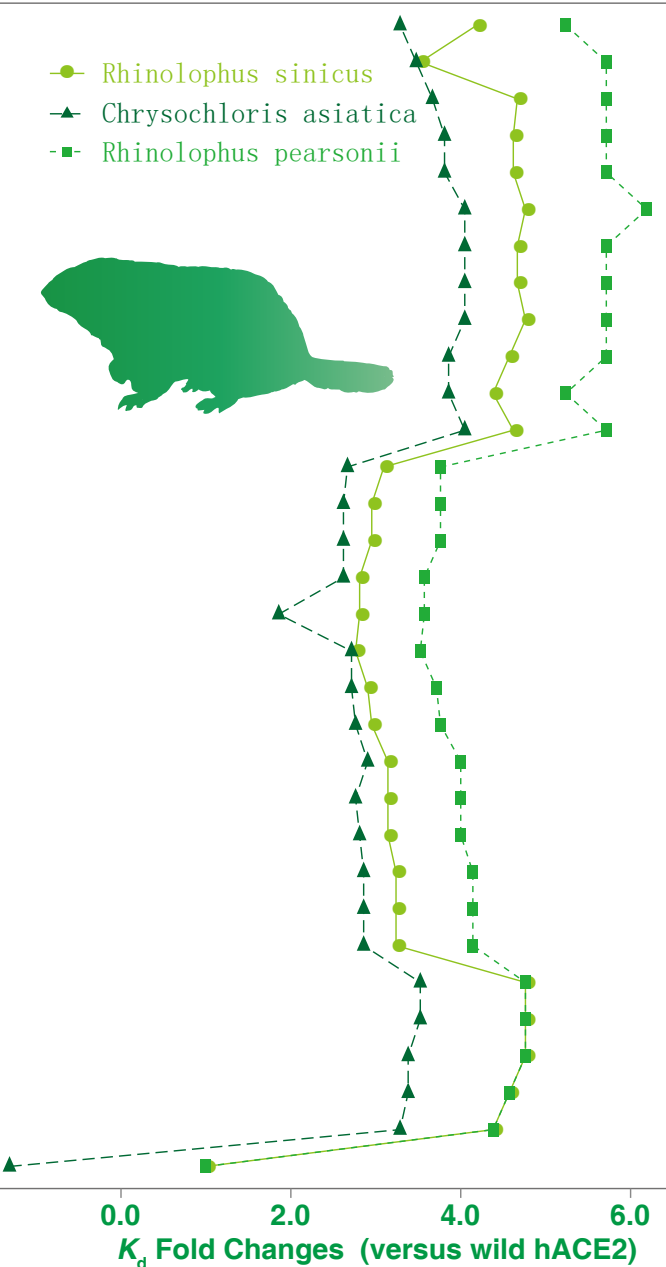

● *Physeter catodon*  
▲ *Procyon lotor*  
■ *Zalophus californianus*

● *Rhinolophus sinicus*  
▲ *Chrysochloris asiatica*  
■ *Rhinolophus pearsonii*

| hACE2 Site | <i>Physeter catodon</i> | <i>Procyon lotor</i> | <i>Zalophus californianus</i> | <i>Rhinolophus sinicus</i> | <i>Chrysochloris asiatica</i> | <i>Rhinolophus pearsonii</i> |
|------------|-------------------------|----------------------|-------------------------------|----------------------------|-------------------------------|------------------------------|
| 603        | QYNNAT                  | QYNNAT               | QYNNAT                        | QYNNAT                     | QYNNAT                        | QYNNAT                       |
| 592        | EYNNDO                  | EYNNDO               | EYNNDO                        | EYNNDO                     | EYNNDO                        | EYNNDO                       |
| 582        | EYNNDO                  | EYNNDO               | EYNNDO                        | EYNNDO                     | EYNNDO                        | EYNNDO                       |
| 577        | EYNNDO                  | EYNNDO               | EYNNDO                        | EYNNDO                     | EYNNDO                        | EYNNDO                       |
| 576        | EYNNDO                  | EYNNDO               | EYNNDO                        | EYNNDO                     | EYNNDO                        | EYNNDO                       |
| 572        | EYNNDO                  | EYNNDO               | EYNNDO                        | EYNNDO                     | EYNNDO                        | EYNNDO                       |
| 571        | EYNNDO                  | EYNNDO               | EYNNDO                        | EYNNDO                     | EYNNDO                        | EYNNDO                       |
| 568        | EYNNDO                  | EYNNDO               | EYNNDO                        | EYNNDO                     | EYNNDO                        | EYNNDO                       |
| 552        | EYNNDO                  | EYNNDO               | EYNNDO                        | EYNNDO                     | EYNNDO                        | EYNNDO                       |
| 429        | EYNNDO                  | EYNNDO               | EYNNDO                        | EYNNDO                     | EYNNDO                        | EYNNDO                       |
| 387        | EYNNDO                  | EYNNDO               | EYNNDO                        | EYNNDO                     | EYNNDO                        | EYNNDO                       |
| 325        | EYNNDO                  | EYNNDO               | EYNNDO                        | EYNNDO                     | EYNNDO                        | EYNNDO                       |
| 305        | EYNNDO                  | EYNNDO               | EYNNDO                        | EYNNDO                     | EYNNDO                        | EYNNDO                       |
| 301        | EYNNDO                  | EYNNDO               | EYNNDO                        | EYNNDO                     | EYNNDO                        | EYNNDO                       |
| 254        | EYNNDO                  | EYNNDO               | EYNNDO                        | EYNNDO                     | EYNNDO                        | EYNNDO                       |
| 215        | EYNNDO                  | EYNNDO               | EYNNDO                        | EYNNDO                     | EYNNDO                        | EYNNDO                       |
| 213        | EYNNDO                  | EYNNDO               | EYNNDO                        | EYNNDO                     | EYNNDO                        | EYNNDO                       |
| 212        | EYNNDO                  | EYNNDO               | EYNNDO                        | EYNNDO                     | EYNNDO                        | EYNNDO                       |
| 211        | EYNNDO                  | EYNNDO               | EYNNDO                        | EYNNDO                     | EYNNDO                        | EYNNDO                       |
| 209        | EYNNDO                  | EYNNDO               | EYNNDO                        | EYNNDO                     | EYNNDO                        | EYNNDO                       |
| 195        | EYNNDO                  | EYNNDO               | EYNNDO                        | EYNNDO                     | EYNNDO                        | EYNNDO                       |
| 193        | EYNNDO                  | EYNNDO               | EYNNDO                        | EYNNDO                     | EYNNDO                        | EYNNDO                       |
| 150        | EYNNDO                  | EYNNDO               | EYNNDO                        | EYNNDO                     | EYNNDO                        | EYNNDO                       |
| 99         | EYNNDO                  | EYNNDO               | EYNNDO                        | EYNNDO                     | EYNNDO                        | EYNNDO                       |
| 95         | EYNNDO                  | EYNNDO               | EYNNDO                        | EYNNDO                     | EYNNDO                        | EYNNDO                       |
| 82         | EYNNDO                  | EYNNDO               | EYNNDO                        | EYNNDO                     | EYNNDO                        | EYNNDO                       |
| 79         | EYNNDO                  | EYNNDO               | EYNNDO                        | EYNNDO                     | EYNNDO                        | EYNNDO                       |
| 64         | EYNNDO                  | EYNNDO               | EYNNDO                        | EYNNDO                     | EYNNDO                        | EYNNDO                       |
| 63         | EYNNDO                  | EYNNDO               | EYNNDO                        | EYNNDO                     | EYNNDO                        | EYNNDO                       |
| 49         | EYNNDO                  | EYNNDO               | EYNNDO                        | EYNNDO                     | EYNNDO                        | EYNNDO                       |
| 41         | EYNNDO                  | EYNNDO               | EYNNDO                        | EYNNDO                     | EYNNDO                        | EYNNDO                       |
| 30         | EYNNDO                  | EYNNDO               | EYNNDO                        | EYNNDO                     | EYNNDO                        | EYNNDO                       |

Stepwise Mutations in hACE2

Figure S7

27 31 39 60 63 74 78 83 91 99 109 120 125 130 135 141 147 153 159 165 171 177 183 189 195 201 207 213 219 225 231 237 243 249 255 261 267 273 279 285 291 297 303 309 315 321 327 333 339 345 351 357 363 369 375 381 387 393 399 405 411 417 423 429 435 441 447 453 459 465 471 477 483 489 495 501 507 513 519 525 531 537 543 549 555 561 567 573 579 585 591 597 603 609 615  
 I T K E N Q N N K L M Q L T A N E N N V D G K K N S D A K Q P Q E E R L N A R F S D  
 T E D N D K N E K N Q T P H S S T S Q T T G K K E Q K D E A P V N E K E N Q A V T K  
 T E D N D K N E K N Q T P H S S T S Q T T G K K E Q K D E A P V N E K E N Q A V T  
 T E D N D K N E K N Q T P H S S T S Q T T G K K E Q K D E A P V N E K E N Q A V  
 T E D N D K N E K N Q T P H S S T S Q T T G K K E Q K D E A P V N E K E N Q A  
 T E D N D K N E K N Q T P H S S T S Q T T G K K E Q K D E A P V N E K E N Q  
 T E D N D K N E K N Q T P H S S T S Q T T G K K E Q K D E A P V N E K E N  
 T E D N D K N E K N Q T P H S S T S Q T T G K K E Q K D E A P V N E K E  
 T E D N D K N E K N Q T P H S S T S Q T T G K K E Q K D E A P V N E K  
 T E D N D K N E K N Q T P H S S T S Q T T G K K E Q K D E A P V N E  
 T E D N D K N E K N Q T P H S S T S Q T T G K K E Q K D E A P V N  
 T E D N D K N E K N Q T P H S S T S Q T T G K K E Q K D E A P V N  
 T E D N D K N E K N Q T P H S S T S Q T T G K K E Q K D E A P V  
 T E D N D K N E K N Q T P H S S T S Q T T G K K E Q K D E A P  
 T E D N D K N E K N Q T P H S S T S Q T T G K K E Q K D E A  
 T E D N D K N E K N Q T P H S S T S Q T T G K K E Q K D E  
 T E D N D K N E K N Q T P H S S T S Q T T G K K E Q K D  
 T E D N D K N E K N Q T P H S S T S Q T T G K K E Q  
 T E D N D K N E K N Q T P H S S T S Q T T G K K E Q  
 T E D N D K N E K N Q T P H S S T S Q T T G K K  
 T E D N D K N E K N Q T P H S S T S Q T T G K  
 T E D N D K N E K N Q T P H S S T S Q T T G  
 T E D N D K N E K N Q T P H S S T S Q T  
 T E D N D K N E K N Q T P H S S T S Q  
 T E D N D K N E K N Q T P H S S T S  
 T E D N D K N E K N Q T P H S S T  
 T E D N D K N E K N Q T P H S S  
 T E D N D K N E K N Q T P H S  
 T E D N D K N E K N Q T P H  
 T E D N D K N E K N Q T P  
 T E D N D K N E K N Q T  
 T E D N D K N E K N Q  
 T E D N D K N E K N  
 T E D N D K N E K  
 T E D N D K N  
 T E D N D K  
 T E D N D  
 T E D N  
 T E D  
 T E  
 T

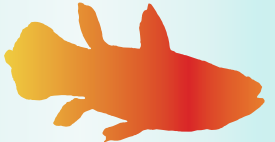

*Latimeria chalumnae*

Stepwise Mutations in hACE2

Candidate high-affinity aa changes of ACE2

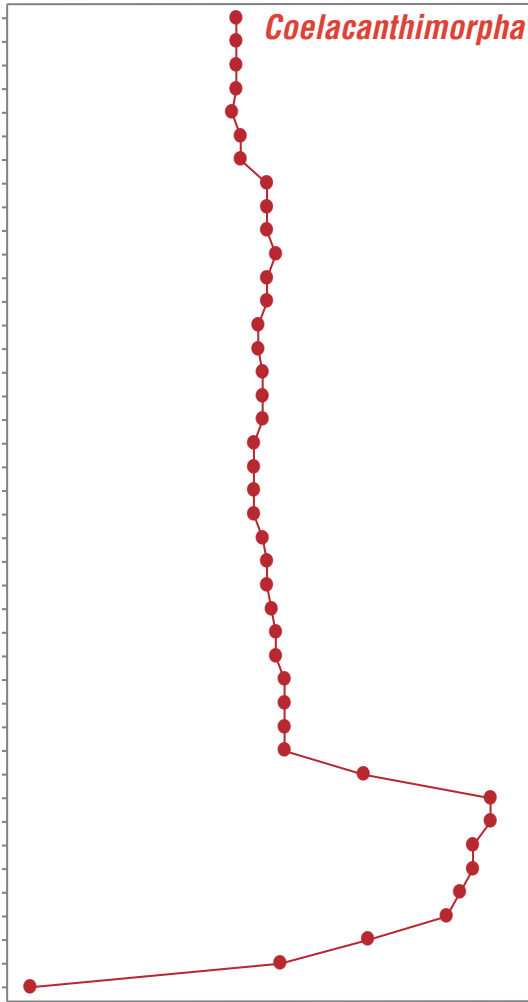

$K_d$  Fold Changes (versus wild hACE2)

hACE2 sites

Candidate low-affinity aa changes of ACE2

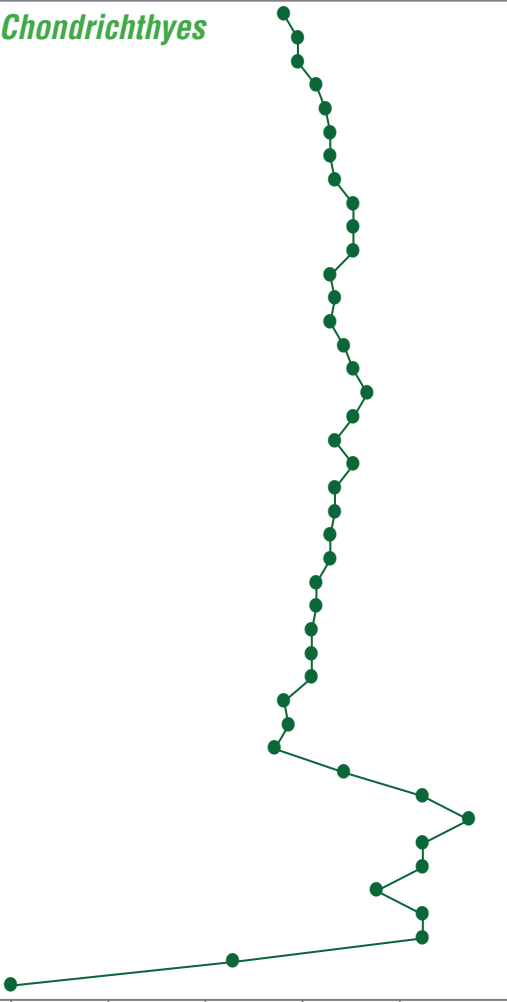

$K_d$  Fold Changes (versus wild hACE2)

27 31 39 60 63 74 78 83 91 99 109 120 125 130 135 141 147 153 159 165 171 177 183 189 195 201 207 213 219 225 231 237 243 249 255 261 267 273 279 285 291 297 303 309 315 321 327 333 339 345 351 357 363 369 375 381 387 393 399 405 411 417 423 429 435 441 447 453 459 465 471 477 483 489 495 501 507 513 519 525 531 537 543 549 555 561 567 573 579 585 591 597 603 609 615  
 I T K E N Q N N K L M Q L T A N E N N V D G K K N S D A K Q P Q E E R L N A R F S D  
 P I S A E L D I Q D K K K K M N V N D V G K M N D E S K Q D D I E D Q R Q E S T S N  
 P I S A E L D I Q D K K K K M N V N D V G K M N D E S K Q D D I E D Q R Q E S T S  
 P I S A E L D I Q D K K K K M N V N D V G K M N D E S K Q D D I E D Q R Q E S T  
 P I S A E L D I Q D K K K K M N V N D V G K M N D E S K Q D D I E D Q R Q E S  
 P I S A E L D I Q D K K K K M N V N D V G K M N D E S K Q D D I E D Q R Q E  
 P I S A E L D I Q D K K K K M N V N D V G K M N D E S K Q D D I E D Q R Q  
 P I S A E L D I Q D K K K K M N V N D V G K M N D E S K Q D D I E D Q R  
 P I S A E L D I Q D K K K K M N V N D V G K M N D E S K Q D D I E D Q  
 P I S A E L D I Q D K K K K M N V N D V G K M N D E S K Q D D I E D  
 P I S A E L D I Q D K K K K M N V N D V G K M N D E S K Q D D I E  
 P I S A E L D I Q D K K K K M N V N D V G K M N D E S K Q D D I  
 P I S A E L D I Q D K K K K M N V N D V G K M N D E S K Q D D  
 P I S A E L D I Q D K K K K M N V N D V G K M N D E S K Q D  
 P I S A E L D I Q D K K K K M N V N D V G K M N D E S K Q  
 P I S A E L D I Q D K K K K M N V N D V G K M N D E S K  
 P I S A E L D I Q D K K K K M N V N D V G K M N D E S  
 P I S A E L D I Q D K K K K M N V N D V G K M N D E  
 P I S A E L D I Q D K K K K M N V N D V G K M N D  
 P I S A E L D I Q D K K K K M N V N D V G K M N  
 P I S A E L D I Q D K K K K M N V N D V G K M  
 P I S A E L D I Q D K K K K M N V N D V G K  
 P I S A E L D I Q D K K K K M N V N D V G  
 P I S A E L D I Q D K K K K M N V N D V  
 P I S A E L D I Q D K K K K M N V N D  
 P I S A E L D I Q D K K K K M N V N  
 P I S A E L D I Q D K K K K M N V  
 P I S A E L D I Q D K K K K M N  
 P I S A E L D I Q D K K K K  
 P I S A E L D I Q D K K K  
 P I S A E L D I Q D K K  
 P I S A E L D I Q D K  
 P I S A E L D I Q D  
 P I S A E L D I Q  
 P I S A E L D I  
 P I S A E L D  
 P I S A E L  
 P I S A E  
 P I S A  
 P I S  
 P I  
 P

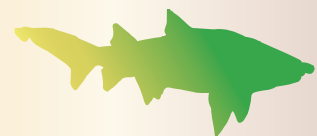

*Scyliorhinus torazame*

Stepwise Mutations in hACE2

Figure S8

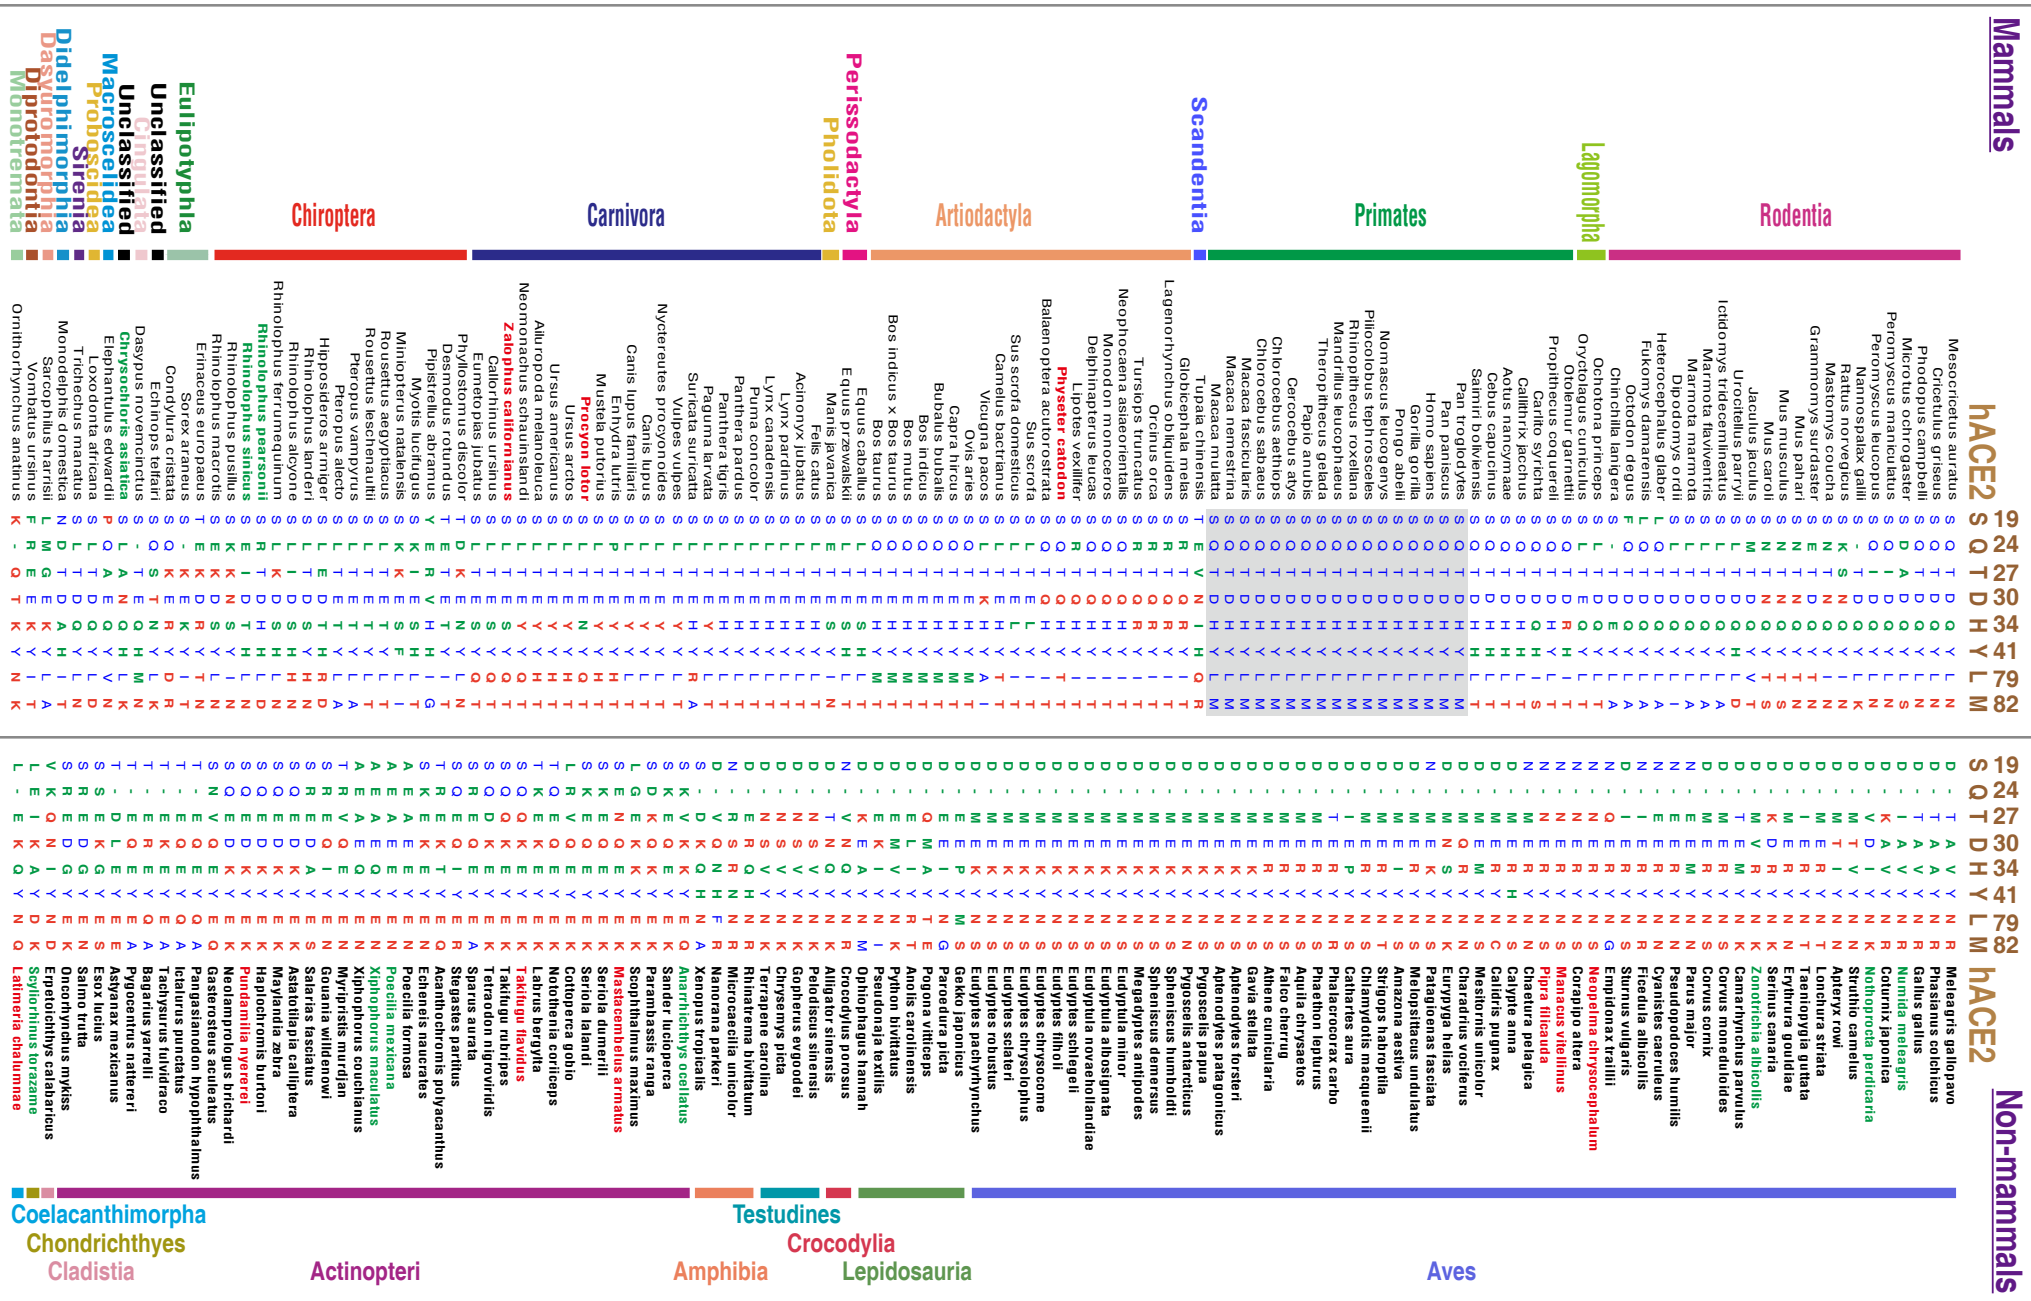

Source: https://www.biorxiv.org/content/10.1101/2021.01.28.428568v1.full.pdf
